# Supplementary material
Source: publisher figshare collection journal article supplement (https://karger.figshare.com/articles/dataset/_/5128048)
Supplement: Supplementary file 1 [file 1]

# Forschende Komplementärmedizin

Wissenschaft • Praxis • Perspektiven

## Research in Complementary Medicine

Research • Practice • Perspectives

Русский перевод,  
том 22, выпуск 3, июнь 2015 года  
DOI: 10.1159/000441213

### Комплексный гомеопатический препарат при лечении инфекций верхних дыхательных путей, сопровождающихся лихорадкой: международное рандомизированное контролируемое исследование

Мануелла Тинессе-Мальвитц<sup>a</sup> Виталий Майданник<sup>b</sup> Томас Келлер<sup>c</sup>  
Петра Клемент<sup>d</sup>

<sup>a</sup>Частная практика, Мюнхен, Германия;

<sup>b</sup>Национальный медицинский университет им. А. А. Богомольца, Киев, Украина;

<sup>c</sup>Acomed Statistics, Лейпциг, Германия;

<sup>d</sup>Deutsche Homöopathie-Union (DHU, Немецкий Гомеопатический Союз), Карлсруэ, Германия

S. Karger  
Medical and Scientific Publishers  
Basel · Freiburg · Paris · London ·  
New York · Chennai · New Delhi ·  
Bangkok · Beijing · Shanghai ·  
Tokyo · Kuala Lumpur ·  
Singapore · Sydney

KARGER

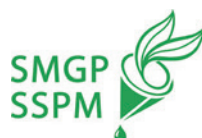



# Комплексный гомеопатический препарат при лечении инфекций верхних дыхательных путей, сопровождающихся лихорадкой: международное рандомизированное контролируемое исследование

Мануелла Тинессе-Мальвитц<sup>a</sup> Виталий Майданник<sup>b</sup> Томас Келлер<sup>b</sup> Петра Клемент<sup>c</sup>

<sup>a</sup>Частная практика, Мюнхен, Германия;

<sup>b</sup>Национальный медицинский университет им. А. А. Богомольца, Киев, Украина;

<sup>c</sup>Acomed Statistics, Лейпциг, Германия;

<sup>d</sup>Deutsche Homöopathie-Union (DHU, Немецкий Гомеопатический Союз), Карлсруэ, Германия

## Ключевые слова

Инфекции верхних дыхательных путей (ИВДП) · простуда, лихорадка · рандомизированное контролируемое клиническое исследование · гомеопатия

## Резюме

**Актуализация проблемы:** Распространенность инфекций верхних дыхательных путей (ИВДП) чрезвычайно высока, что сопровождается значительными медицинскими расходами. В настоящем исследовании была проведена оценка клинических преимуществ гомеопатического препарата при его применении в комплексной терапии. **Пациенты и методы:** В данное международное рандомизированное контролируемое клиническое исследование были включены пациенты (диапазон возраста: 1–65 лет) с ИВДП, сопровождающихся лихорадкой, которые проходили либо только курс стандартного симптоматического лечения (группа ST: парацетамол, амброксол и/или оксиметазолин), либо получали еще дополнительно комплексный гомеопатический препарат (группа IFC: Инфлюцид) в течение 7 дней в дополнение к стандартному лечению. Симптомы ИВДП оценивались с использованием Висконсинского опросника, состоящего из 21 пункта по симптомам поражения верхних дыхательных путей (Wisconsin Upper Respiratory Symptom Survey-21). Первичным критерием эффективности являлась клиническая динамика симптомов у пациента на 4-й день – так называемый «ответ на лечение», который определялся как отсутствие лихорадки и отсутствие или очень незначительная выраженность симптомов ИВДП. **Результаты:** В 12 центрах Украины и в 10 центрах Германии были рандомизированы 523 пациента (265 группа IFC, 258 группа ST). «Ответ на лечение» на 4-й день был отмечен у 15,4% пациентов в группе IFC и у 6,7% в группе ST ( $\Delta_{IFC-ST} = 8,7\%$ ; 95%-ный доверительный интервал: 2,9–14,5%). Пациенты из группы IFC применяли меньше препаратов для симптоматического лечения, а симптомы у них исчезали на 1–2 дня раньше. В группах IFC и ST было выявлено соответственно 3 и 8 нежелательных явлений (НЯ), связь которых с лечением была признана возможной; 2 из 3 НЯ, выявленных в группе IFC, были положительно связаны с симптоматическим лечением, а 1 НЯ (рвота) – с применением Инфлюцида. **Вывод:** Комплексный гомеопатический препарат сокращал продолжительность течения ИВДП, снижал потребность в применении препаратов для симптоматического лечения и хорошо переносился.

© 2015 S. Karger GmbH, Freiburg

## Keywords

Upper respiratory tract infections · Common cold · Fever Randomized controlled clinical trial · Homeopathy

## Summary

**Background:** Upper respiratory tract infections (URTI) are very common and associated with considerable healthcare costs. We evaluated the clinical benefit of a homeopathic add-on therapy. **Patients and Methods:** In this randomized controlled multinational clinical trial, patients (age range 1–65 years) with feverish URTI received either on-demand symptomatic standard treatment (ST group: paracetamol, ambroxol, and/or oxymetazoline), or homeopathic medication (IFC group: Influcid®) for 7 days plus the same on-demand standard treatment. URTI symptoms were assessed using the Wisconsin Upper Respiratory Symptom Survey-21. Response at day 4, defined as absence of fever and absence or very mild degree of URTI symptoms, was the primary outcome measure. **Results:** 523 patients (265 IFC group, 258 ST group) were randomized in 12 Ukrainian and 10 German centers. The responder rate on day 4 was 15.4% in the IFC group and 6.7% in the ST group ( $\Delta_{IFC-ST} = 8.7\%$ , 95% confidence interval 2.9–14.5%). The IFC group used less symptomatic medication, and symptoms were alleviated 1–2 days earlier. 3 and 8 adverse events (AEs) in the IFC and ST group, respectively, were assessed as possibly treatment-related; 2 out of the 3 AEs in the IFC group were possibly related to symptomatic therapy, 1 (vomiting) to IFC treatment. **Conclusion:** The homeopathic treatment shortened URTI duration, reduced the use of symptomatic medication, and was well tolerated.

## Введение

Инфекции верхних дыхательных путей (ИВДП) или простудные заболевания относятся к наиболее частым заболеваниям в мире и являются одной из основных причин нетрудоспособности и пропуска школы. ИВДП сопровождаются значительными прямыми и косвенными медицинскими расходами, что является серьезной экономической нагрузкой для системы здравоохранения [1]. У большинства взрослых и подростков простудные заболевания возникают 2–4 раз в год, в то время как у детей младшего возраста они могут возникать 6–8 раз в год или даже чаще [2–4]. Наиболее частыми ранними симптомами являются боль в горле, насморк, общее недомогание и невысокая лихорадка в начале болезни, после которых возникают заложенность носа и кашель. Как правило, симптомы достигают максимума на 3-й или 4-й день и сохраняются в течение 1–2 недель; медиана продолжительности симптомов составляет 7 дней [5, 6]. В большинстве случаев ИВДП вызываются вирусами, чаще всего риновирусами [2, 7–9]; однако возбудителями ИВДП могут служить и вирусы гриппа [10].

Строго детерминированных методов специфической терапии ИВДП не существует, поэтому лечение является в основном симптоматическим [11]. Наиболее часто в медикаментозной терапии применяются жаропонижающие средства, противовоспалительные препараты, отхаркивающие средства, деконгестанты и средства против кашля – как отдельно, так и в комбинации друг с другом. Меры поддерживающей терапии могут включать постельный режим, горячие ванны, полоскание горла и обильное питье [6]. Кроме того, широко применяются и антибиотики, которые часто являются бесполезными, поскольку ИВДП в большинстве случаев вызываются вирусами [11]. Антибиотики показаны лишь в случае бактериальной инфекции (например, стрептококковой), а также для профилактики суперинфекций [12, 13]; чрезмерное применение антибиотиков может провоцировать появление внебольничных устойчивых возбудителей, что приводит к увеличению риска побочных явлений, а с экономической точки зрения еще к более тяжелой нагрузке на систему здравоохранения [14].

Все более популярными в терапии становятся гомеопатические лекарственные средства [15]. Безопасные и эффективные методы лечения могли бы стать полезным дополнением к общепринятой терапии, в частности потому, что многие традиционно применяемые препараты не предназначены для детей младшего возраста. Гомеопатические препараты применяются уже более 200 лет, а основной целью их применения является стимуляция собственных защитных сил организма. Исследуемый гомеопатический препарат Инфлюцид® (IFC, *Deutsche Homöopathie-Union (DHU, Немецкий Гомеопатический Союз, Карлсруэ, Германия)* в своей первоначальной форме появился на рынке в Германии еще в 1928 г., а в настоящее время он присутствует в 22 странах по всему миру. Инфлюцид является фиксированной комбинацией из 6-ти отдельных гомеопатических компонентов, которые воздействуют на широкий спектр

симптомов ИВДП. Предварительные исследования показали, что данный препарат эффективен и безопасен при лечении простуды как у взрослых, так и у детей [16, 17].

Поскольку традиционные методы лечения ИВДП не всегда эффективны, а зачастую приводят к побочным эффектам и необоснованному применению антибиотиков, поиск новых безопасных и эффективных вариантов лечения представляется оправданным. В этой связи, была поставлена задача оценить эффективность и безопасность препарата Инфлюцид в качестве дополнения к стандартному симптоматическому лечению ИВДП. При этом были приняты во внимание методологии исследований, опубликованных на тему лечения гриппа с помощью гомеопатических препаратов [18, 19].

## Методы

Рандомизированное, параллельно-групповое, открытое, многоцентровое, международное клиническое исследование со стандартной терапией (ST) в качестве контроля было проведено в соответствии с Руководством ICH (Международной конференции по гармонизации технических требований к регистрации лекарственных препаратов для человека) по Надлежащей клинической практике и отвечало принципам Хельсинской декларации. Пациенты отбирались с ноября 2010 г. по апрель 2011 г. в 12 центрах в Украине (4 врача общей практики и 8 педиатров) и в 10 центрах в Германии (4 врача общей практики и 6 педиатров), что было одобрено соответствующим этическим комитетом и уполномоченными инстанциями. Исследование было внесено в регистр исследований ISRCTN до начала отбора пациентов (№ ISRCTN60440500).

Дети и взрослые пациенты с клиническими признаками и симптомами ИВДП, сопровождающимися лихорадкой  $\geq 37,5^{\circ}\text{C}$  (температура в подмышечной впадине) и длительностью до 24 часов, проходили скрининг на соответствие критериям включения и исключения (таблица 1).

Пациенты, которые подходили для исследования и давали письменное информированное согласие, проходили рандомизацию, по результатам которой они получали либо только необходимое симптоматическое стандартное лечение (группа ST: парацетамол, амброксол и/или оксиметазолин), либо такое же стандартное лечение в комбинации с препаратом Инфлюцид в качестве дополнительного средства на протяжении 7 дней (группа IFC). Рандомизация проводилась централизованно блоками по 4 пациента с использованием программы для генерации случайной последовательности SAS версии 9.1 (SAS Institute Inc., Кэри, Северная Каролина, США). Пациентам, которые соответствовали критериям, последовательно присваивались номера в порядке их включения в исследование. Эта процедура надлежащим образом обеспечивала маскировку схем лечения, назначенных случайным образом. Для деления пациентов по возрасту ( $< 12$  или  $\geq 12$  лет) их возраст отслеживался по факсам о проведенной рандомизации; при этом отбор был прекращен после того, как в данной возрастной группе было достигнуто целевое число пациентов.

Пациенты вели дневник и измеряли температуру тела в подмышечной впадине несколько раз в день. Исследователи принимали и обследовали пациентов в рамках исходной оценки (визит в 1-ый день), затем на 4-ый, 8-ой и 15-ый дни; кроме того, исследователи звонили пациентам по телефону на 2-ой и 3-ий дни. Использовались таблетки Инфлюцид, содержащие фиксированную комбинацию следующих отдельных гомеопатических компонентов (цифра после буквы D соответствует количеству этапов десятикратного разведения): Aconitum (аконит) D3, Bryonia (красный или белый переступень) D2, Eupatorium perfoliatum (посконник) D1, Gelsemium (желтый жасмин) D3, Ipecacuanha (ипекакуана) D3 и Phosphorus (фосфор) D5. В первые 72 часа подростки ( $\geq 12$  лет) и взрослые должны были принимать внутрь 12 таблеток в день (по 1 таблетке каждый час), а дети ( $< 12$  лет) – 8 таблеток в день (по 1 таблетке каждые 2

**Таблица 1.**  
Критерии  
соответствия

| Критерии включения                                                                                                                                                                                                                                                                                                                                                                                                                                                                                                                                                                                                                                                                                                                                                                                                                      | Критерии исключения                                                                                                                                                                                                                                                                                                                                                                                                                                                                                                                                                                                                                                                                                                                                                                                                                                                                                                                                                                                                                                                                                                                                                                                                                                                                                                                                                                                                                                                                                                                                                                                                                                                                                                                                                                                                                                                                                                                                                                                                                                                                                                                               |
|-----------------------------------------------------------------------------------------------------------------------------------------------------------------------------------------------------------------------------------------------------------------------------------------------------------------------------------------------------------------------------------------------------------------------------------------------------------------------------------------------------------------------------------------------------------------------------------------------------------------------------------------------------------------------------------------------------------------------------------------------------------------------------------------------------------------------------------------|---------------------------------------------------------------------------------------------------------------------------------------------------------------------------------------------------------------------------------------------------------------------------------------------------------------------------------------------------------------------------------------------------------------------------------------------------------------------------------------------------------------------------------------------------------------------------------------------------------------------------------------------------------------------------------------------------------------------------------------------------------------------------------------------------------------------------------------------------------------------------------------------------------------------------------------------------------------------------------------------------------------------------------------------------------------------------------------------------------------------------------------------------------------------------------------------------------------------------------------------------------------------------------------------------------------------------------------------------------------------------------------------------------------------------------------------------------------------------------------------------------------------------------------------------------------------------------------------------------------------------------------------------------------------------------------------------------------------------------------------------------------------------------------------------------------------------------------------------------------------------------------------------------------------------------------------------------------------------------------------------------------------------------------------------------------------------------------------------------------------------------------------------|
| <p>Пациенты в возрасте от 1 года до 65 лет</p> <p>Диагноз ИВДП со следующими симптомами, продолжающимися 24 часа или меньше:</p> <p>а) Лихорадка (температура в подмышечной впадине <math>\geq 37,5^{\circ}\text{C}</math>)</p> <p>б) Как минимум 1 из симптомов ИВДП:<br/><i>Назальные симптомы (заложенность носа, насморк, чихание)</i><br/><i>Фарингеальные симптомы (першение в горле, боль в горле, покраснение горла)</i><br/><i>Кашель (кашель без подозрения на острое заболевание нижних дыхательных путей)</i></p> <p>в) Как минимум 1 общий симптом<br/><i>Утомляемость</i><br/><i>Слабость</i><br/><i>Разбитость</i><br/><i>Только для детей: раздражительность/плаксивость или пониженная активность</i></p> <p>Письменное информированное согласие</p> <p>Желание и способность соблюдать все процедуры исследования</p> | <p>Тяжелая или осложненная форма ИВДП</p> <p>Признаки острого заболевания нижних дыхательных путей</p> <p>Текущие симптомы, вызванные каким-либо иным основным острым ЛОР-заболеванием</p> <p>Наличие хронического воспалительного заболевания ЛОР-органов или дыхательных путей</p> <p>Обструктивные анатомические особенности в носоглотке</p> <p>Тяжелое сопутствующее заболевание, включая злокачественное новообразование, диагностированное в течение 5 лет до включения</p> <p>Непереносимость галактозы, недостаточность лактазы Лаппа или синдром мальабсорбции глюкозы и галактозы</p> <p>Гиперчувствительность к любым компонентам и/или вспомогательным веществам Инфлюцида, гиперчувствительность к любым компонентам и/или вспомогательным веществам, а также любые известные противопоказания к применению одного из препаратов для симптоматического лечения</p> <p>Положительный результат скрининг-теста на <math>\beta</math>-гемолитические стрептококки группы А</p> <p>Применение антибиотиков, глюкокортикостероидов, иммуномодуляторов или антигистаминных средств в течение 4 недель до включения или на момент включения, а также текущее заболевание, требующее применения этих препаратов в ходе исследования</p> <p>Заболевание, требующее применения противовирусных препаратов</p> <p>Применение жаропонижающих препаратов, назальных деконгестантов, отхаркивающих средств и/или любых других препаратов для лечения простуды или средств облегчения ИВДП, например, местных анестетиков, противовоспалительных препаратов, противокашлевых средств, гомеопатических препаратов, пищевых добавок или препаратов, содержащих цинк, эхинацею, чеснок или витамин С (<math>\geq 100\text{ мг/сут}</math>), в течение 7 дней до включения или на момент включения</p> <p>Активное курение либо установленная или подозреваемая наркомания</p> <p>Неправильная контрацепция, беременность, лактация или желание забеременеть или кормить грудью</p> <p>Участие в другом клиническом исследовании в течение 3 месяцев до включения</p> <p>Невозможность или неспособность понять суть, значение и цели исследования</p> |

часа); в последующие 96 часов подростки и взрослые должны были принимать по 2 таблетки 3 раза в сутки, а дети – по 1 таблетке 3 раза в сутки. В качестве средств стандартного симптоматического лечения всем пациентам предлагали применять по мере необходимости парацетамол в виде сиропа, амброксол в виде сиропа и оксиметазолин в виде назального спрея (т.е. соответственно жаропонижающее средство, отхаркивающее средство и назальный деконгестант).

Главная задача исследования состояла в том, чтобы оценить эффективность и безопасность препарата Инфлюцид в качестве дополнения к стандартному симптоматическому лечению ИВДП. Основным показателем служил «ответ на лечение», который определяли как наличие следующих двух критериев одновременно: 1) средняя температура в подмышечной впадине на 4-ый день составляет  $\leq 37,2^{\circ}\text{C}$  и 2) симптомы выражены в слабой степени или отсутствуют вовсе. Симптомы ИВДП оценивались с использованием Висконсинского опросника 21 по симптомам верхних дыхательных путей (WURSS-21), который включает в себя 21 вопрос по качеству жизни, связанному со здоровьем и данными симптомами. В том числе 1 вопрос по тяжести заболевания в целом, 10 вопросов по симптомам, 9 вопросов по нарушению функции и качеству жизни и 1 вопрос по общим изменениям; оценки даются по семибальной шкале Ликерта [20]. Опросник WURSS-21 был переведен на немецкий, русский и украинский языки и валидирован путем обратного перевода и когнитивных интервью. «Ответ на лечение» считался подтвержденным, если балл по первому пункту

опросника WURSS-21 «Как вы себя сегодня чувствуете?» утром и вечером 4-го дня был 0 («не чувствую себя больным») или 1 («очень легкие симптомы»).

Дополнительными показателями эффективности служили: процент пациентов с «ответом на лечение», наступившим в другие дни (не на 4-ый день); время начала ослабления симптомов (балл по первому пункту опросника WURSS-21  $\leq 1$ ); процент пациентов, у которых в период наблюдения их обычная повседневная активность восстановилась до нормального уровня; тяжесть и течение заболевания, измеряемые как площадь под кривой (AUC) для суммарного балла по шкале WURSS-21 (пункты 2-20 опросника WURSS-21) и сводного индекса симптомов WURSS (пункты 2-11 опросника WURSS-21), а также индекса качества жизни WURSS (пункты 12-20 опросника WURSS-21); индивидуальное улучшение симптомов (пункты 2-20 опросника WURSS-21, а кроме того головная боль, боль в конечностях, слабость, отсутствие аппетита, а у детей – раздражительность и снижение активности; дозы и продолжительность лечения парацетамолом, амброксолом и оксиметазолином; отсутствие лихорадки; гиперемия слизистой оболочки и нарушения носового дыхания. Безопасность оценивалась на основании возникающих нежелательных явлений (НЯ).

Точного расчёта объема выборки не предусматривалось, поскольку данное исследование было поисковым. В исследование планировалось включить 520 пациентов. Это число было рассчитано проспективно исходя из самого плохого сценария: при предполагаемой частоте выбывания

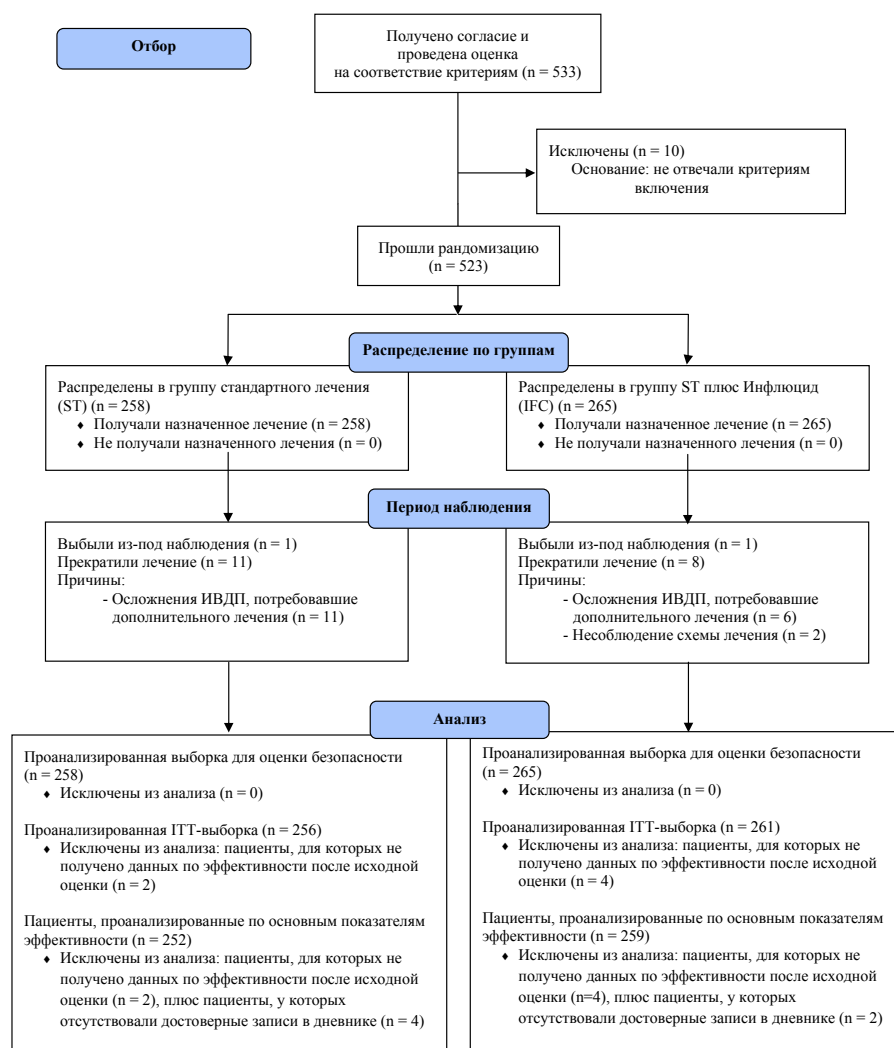

**Рисунок 1.** Распределение участников исследования.

пациентов в 5% и при допущении, что частота «ответа на лечение» в группе ST составит 7% и менее, анализ 494 пациентов (247 на группу) позволил бы с вероятностью > 80% показать преимущества IFC, в группе которого «ответ на лечение» составил бы 8% и выше.

Статистический анализ проводился по принципу «намерение проводить лечение» («intention-to-treat», ITT). ITT-выборка включала пациентов, которые прошли рандомизацию и для которых была проведена по крайней мере 1 оценка эффективности после первого визита с исходной оценкой. Кроме того, проводился анализ «по протоколу». Анализ безопасности охватывал всех рандомизированных пациентов. При отсутствии данных (в том числе, когда пациент досрочно выбывал из исследования) применялась процедура переноса вперед последнего доступного наблюдения («last observation carry forward», LOCF). «Ответ на лечение» анализировался с использованием критерия  $\chi^2$ . Для поисковых межгрупповых анализов применялся U-критерий Манна-Уитни (Mann-Whitney U test, MWU). Различия между схемами лечения были также представлены в виде оценок сдвига положения Ходжеса-Лемана (Hodges-Lehmann, HL) и их 95%-ных доверительных интервалов (ДИ). Ошибка I рода (альфа) была задана на уровне 0,05. Для тестирования многочисленных дополнительных показателей никакой коррекции не проводилось, поэтому (несмотря на статистическую значимость) допускался случайный характер некоторых из них. Результаты дополнительных анализов интерпретировались главным образом исходя из степени их соответствия результатам основного анализа.

## Результаты

### Участники

В общей сложности было рандомизировано 523 пациента (223 в Германии, 300 в Украине). ITT-выборка включала 261 пациента из группы IFC (130 пациентов в возрасте < 12 лет, 131 пациент в возрасте  $\geq$  12 лет) и 256 пациентов из группы ST (131 пациент в возрасте < 12 лет, 125 пациентов в возрасте  $\geq$  12 лет). На рисунке 1 показано, как распределялись пациенты по разным этапам исследования, включая период наблюдения.

Ни по исходным демографическим показателям, ни по клиническим характеристикам обе группы пациентов достоверно не различались (таблица 2). Вирусологический анализ показал, что вирусом гриппа были инфицированы лишь 14% пациентов с ИВДП.

### Анализ эффективности

Первый из основных показателей (процент пациентов без лихорадки на 4-ый день) в группе IFC статистически значимо

**Таблица 2.** Сравнение групп по демографическим, клиническим и другим значимым характеристикам – анализ на основе выборки «по намерению проводить лечение» (ITT-анализ)

| Характеристики                                                         | Группа IFC, n = 261 | Группа ST, n = 256 |
|------------------------------------------------------------------------|---------------------|--------------------|
| Медиана (P25, P75) возраста в годах                                    |                     |                    |
| Дети (< 12 лет)                                                        | 4,0 (3,0, 7,0)      | 5,0 (3,0, 7,0)     |
| Взрослые/подростки (≥ 12 лет)                                          | 33,0 (20,0, 45,0)   | 33,0 (22,0, 43,0)  |
| Пол, мужской/женский <sup>a</sup> , n (%)                              | 104 (40) / 157 (60) | 118 (46)/138 (54)  |
| Медиана (P25, P75) роста в см                                          |                     |                    |
| Дети (< 12 лет)                                                        | 110 (98, 126)       | 111 (97, 128)      |
| Взрослые/подростки (≥ 12 лет)                                          | 168 (162, 175)      | 170 (164, 178)     |
| Медиана (P25, P75) массы тела в кг                                     |                     |                    |
| Дети (< 12 лет)                                                        | 19,3 (15,0, 25,0)   | 19,0 (14,8, 25,0)  |
| Взрослые/подростки (≥ 12 лет)                                          | 68,0 (58,0, 80,0)   | 71,1(60,0, 84,0)   |
| Результаты анализа на вирус гриппа (ПЦР-анализ), n (%) <sup>a</sup>    |                     |                    |
| Вирусы гриппа А и В не выявлены                                        | 227 (87)            | 219 (86)           |
| Выявлен вирус гриппа А                                                 | 19 (7)              | 31 (12)            |
| Выявлен вирус гриппа В                                                 | 12 (5)              | 6 (2)              |
| Температура тела при исходной оценке, среднее (± ст.откл.), °С         | 38,0 (0,4)          | 38,0 (0,4)         |
| Основные симптомы ИВДП при исходной оценке, n (%) <sup>a</sup>         |                     |                    |
| Гиперемия слизистых                                                    | 237 (91)            | 228 (89)           |
| Нарушение носового дыхания                                             | 223 (85)            | 229 (90)           |
| Нарушение способности выполнять повседневные действия                  | 196 (75)            | 209 (82)           |
| Назальные симптомы                                                     | 231 (89)            | 240 (94)           |
| Фарингальные симптомы                                                  | 240 (92)            | 232 (91)           |
| Кашель                                                                 | 194 (74)            | 208 (81)           |
| Ощущение усталости                                                     | 257 (98)            | 249 (97)           |
| Слабость                                                               | 252 (97)            | 248 (97)           |
| Разбитость                                                             | 208 (80)            | 208 (81)           |
| Раздражительность/плаксивость <sup>b</sup>                             | 114 (88)            | 114 (87)           |
| Сниженная активность <sup>b</sup>                                      | 125 (96)            | 126 (96)           |
| Общий балл по шкале WURSS-21 при исходной оценке, среднее (± ст.откл.) | 71,4 (24,7)         | 74,4 (25,5)        |

<sup>a</sup>Проценты округлялись до ближайшего целого значения.

<sup>b</sup>Оценивалась только у детей младше 12 лет (в общей сложности в возрасте < 12 лет принимал участие 261 пациент, из них соответственно 130 пациентов в группе IFC и 131 пациент в группе ST).

ПЦР – полимеразная цепная реакция; ст.откл. – стандартное отклонение.

превосходил показатель группы ST (76,8% в группе IFC и 56,7% в группе ST;  $p < 0,001$ ). Второй из основных показателей (процент пациентов, у которых на 4-ый день симптомы, оцениваемые по шкале WURSS-21, отсутствовали или были незначительными) в группе IFC также статистически значимо превосходил показатель группы ST (17,0% в группе IFC и 7,5% в группе ST;  $p < 0,0012$ ). Главная конечная точка – а именно «ответ на лечение» исходя из обоих основных показателей на 4-ый день – в группе IFC была достигнута достоверно чаще (15,4%), чем в группе ST (6,7%) ( $\Delta_{IFC-ST} = 8,7\%$ , 95% ДИ: 2,9–14,5%). Анализ «по протоколу» подтвердил результаты ITT-анализа (данные не представлены).

По применению препаратов для симптоматического лечения в подгруппе пациентов «с ответом на лечение» (на 4-ый день) обе исследуемые группы существенно не различались. В подгруппе пациентов «без ответа на лечения» препараты для симптоматического лечения применялись в большем объеме в группе ST.

На рисунке 2 показана межгрупповая разница и процентное соотношение пациентов с «ответом на лечение» для всего

периода исследования продолжительностью 14 дней. Этот рисунок демонстрирует, что «ответ на лечение» в группе IFC возник быстрее. Наблюдаемая разница достигала уровня статистической значимости на 4-ый день ( $\Delta_{IFC-ST} = 8,7\%$ ), выходила на максимум на 7-ой день ( $\Delta_{IFC-ST} = 28,9\%$ , 95% ДИ 20,3–37,6%) и сохранялась до 11-ого дня ( $\Delta_{IFC-ST} = 10,0\%$ , 95% ДИ 2,4-7,7%).

Результаты анализа дополнительных показателей (таблица 3) совпадали с результатами анализа основных показателей: редукция симптомов в соответствии с первым пунктом опросника WURSS в группе IFC наступало на 1–2 дня раньше (критерий MWU:  $Z = -6,30$ ,  $p < 0,0001$ ; HL:  $\Delta_{IFC-ST} = -2$  дня, 95% ДИ: от –2 до –1 дня). На рисунке 3 показано совокупное процентное распределение пациентов с редукцией симптомов по дням исследования. Доля пациентов, у которых нормальная повседневная активность восстановилась к первому визиту в рамках наблюдения (контрольному визиту), в группе IFC была на 20% выше (IFC: 48%; ST: 28%). Значения AUC для суммарного балла по шкале WURSS-21 и для баллов по отдельным дополнительным шкалам опросника говорили о том, что тяжесть

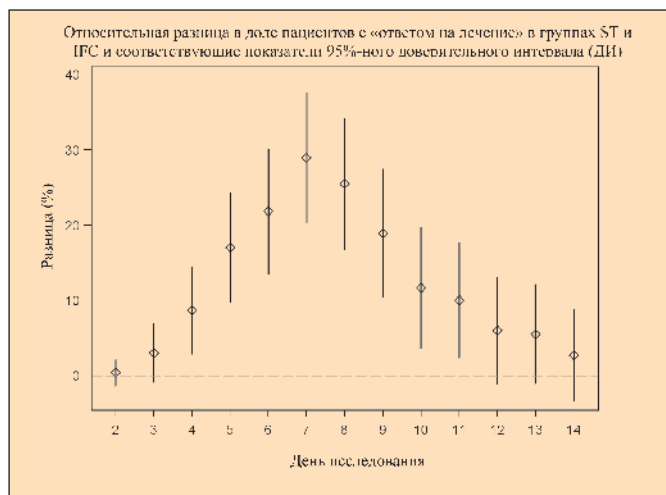

**Рисунок 2.** Межгрупповая разница в проценте пациентов с «ответом на лечение» (IFC минус ST) в разные дни исследования (с указанием 95%-ных ДИ).

заболевания (медианное значение) в группе IFC в период наблюдения была достоверно ниже. Соответственно, нарушения, связанные с отдельными симптомами и с аспектами качества жизни, которые оценивались по отдельным пунктам опросника WURSS-21 (2–20) и по дополнительным вопросам относительно имеющихся жалоб, в группе IFC приходили в норму достоверно раньше, чем в группе ST (таблица 4). Доля пациентов, применявших препараты для симптоматического лечения, в группе IFC была ниже, а количество применявшихся препаратов – меньше; кроме того, пациенты из группы IFC раньше прекращали лечение этими препаратами. Доля пациентов, у которых на первом контрольном визите отсутствовала лихорадка, в группе IFC была на 14% выше (IFC: 82,4%; ST: 68,8%), однако, на втором контрольном визите, когда лихорадка прошла у более чем 90% пациентов, статистически значимой разницы между группами выявлено не было. Гиперемия слизистых и нарушение носового дыхания в группе IFC отмечались достоверно реже как на первом, так и на втором контрольных визитах.

Доля пациентов, которые соблюдали назначенные в исследовании схемы основного и поддерживающего лечения, составила более 90%.

#### Оценка безопасности

В ходе исследования по крайней мере 1 нежелательное явление (НЯ) возникло у 64 из 523 (12,2%) пациентов: у 29/265 (10,9%) пациентов из группы IFC и у 35/258 (13,6%) пациентов из группы ST. Всего было отмечено 85 отдельных НЯ. Все НЯ были отнесены к категории «не серьезных». Для трех НЯ, отмеченных в группе IFC, причинно-следственная связь была признана «возможной»: для 2 явлений (боль в верхней области живота, астения) возможной представлялась связь с симптоматическим лечением, а для 1 явления (рвота) – с препаратом Инфлюцид. Для 8 НЯ (тошнота (n = 2), диарея, сухость во

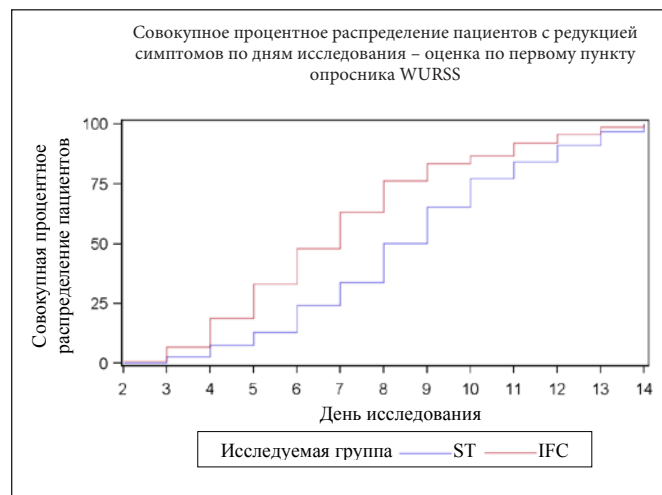

**Рисунок 3.** Совокупное процентное распределение пациентов с редукцией симптомов (в соответствии с первым пунктом опросника WURSS) по дням исследования.

рту, гастроэзофагеальный рефлюкс, сухость слизистой носа, сыпь, нарушение зрения), возникших у 7 пациентов из группы ST, связь с препаратом была признана вероятной или возможной. 2 НЯ (оба в группе IFC) были тяжелыми, однако они были признаны не связанными с применяемыми препаратами; остальные 83 НЯ были легкой или средней степени тяжести. 6 (2,3%) пациентов из группы IFC и 11 (4,3%) пациентов из группы ST были исключены из исследования по причине НЯ, которые были отнесены к категории осложнений, требовавших применения антибиотиков, глюкокортикостероидов, иммуномодуляторов, антигистаминных средств или противовирусных препаратов.

## Обсуждение

### Основные результаты

Препарат Инфлюцид, применявшийся в комплексном лечении, улучшал показатель «ответ на лечение», сокращал длительность ИВДП, уменьшал потребность в применении средств симптоматического лечения и снижал тяжесть заболевания. В целом, из полученных результатов следует, что Инфлюцид способствовал самостоятельному выздоровлению пациентов и снижал потребность в применении традиционных средств симптоматического лечения, частично заменяя их. Результаты также подтвердили хорошую переносимость Инфлюцида.

### Сильные и слабые стороны исследования

Данное исследование было рандомизированным, и были приняты меры, обеспечивающие маскировку схем лечения, назначенных случайным образом. Исследуемая выборка была очень широкой и включала как пациентов детского возраста, так и взрослых. Поскольку бактериальные ИВДП исключались, пациенты исследуемой выборки в значительной степени

**Таблица 3.** Дополнительные показатели эффективности, анализ по намерению проводить лечение (ITT-анализ)

| Показатель результативности                                                                                  | Группа IFC, n = 261 | Группа ST, n = 256   | Критерий, статистика <sup>a</sup> | p-значение |
|--------------------------------------------------------------------------------------------------------------|---------------------|----------------------|-----------------------------------|------------|
| Время до ослабления симптомов, оцениваемого по 1-му пункту опросника WURSS <sup>6</sup> , дни                | 6,6                 | 8,5                  | Z = -6,30                         | < 0,0001   |
| Восстановление нормальной повседневной активности <sup>б</sup> к 1-му контрольному визиту (4-ый день), n (%) | 94/196 (48,0)       | 58/209 (27,8)        | $\chi^2(1) = 17,62$               | < 0,001    |
| Степень тяжести симптомов, медиана (P25, P75), n (%)                                                         |                     |                      |                                   |            |
| AUC для общего балла по шкале WURRS-21                                                                       | 643,5 (395, 952)    | 928,0 (597, 1.312)   | Z = -5,67                         | < 0,001    |
| AUC для индекса симптомов по шкале WURRS-21 (пункты 2-11)                                                    | 304,0 (197, 453)    | 425,0 (290, 611)     | Z = -5,81                         | < 0,001    |
| AUC для индекса качества жизни по шкале WURRS-21 (пункты 12-20)                                              | 342,0 (192, 524)    | 484,0 (285, 710)     | Z = -4,99                         | < 0,001    |
| Применение препаратов для симптоматического лечения <sup>г</sup> (парацетамол, амброксол, оксиметазолин)     |                     |                      |                                   |            |
| Пациенты, применявшие любой препарат для симптоматического лечения, n (%)                                    | 222/259 (85,7)      | 247/252 (98,0)       | $\chi^2(1) = 25,62$               | < 0,001    |
| Длительность применения препарата для симптоматического лечения, медиана (P25, P75), дни                     | 6 (4, 9)            | 9 (7, 12)            | Z = -7,12                         | < 0,001    |
| Общее количество парацетамола, медиана (P25, P75), мг                                                        | 600,0 (0, 2,200)    | 1.750,0 (400, 1.750) | Z = -6,22                         | < 0,001    |
| Общее количество амброксола, медиана (P25, P75), мг                                                          | 112,5 (0, 390)      | 315,0 (113, 630)     | Z = -5,91                         | < 0,001    |
| Общее количество оксиметазолина, медиана (P25, P75), мкг                                                     | 292,5 (0, 675)      | 720,0 (253, 1.080)   | Z = -6,39                         | < 0,001    |
| Температура в подмышечной впадине <sup>д</sup> (отсутствие лихорадки), n (%)                                 |                     |                      |                                   |            |
| 1-й контрольный визит (4-ый день)                                                                            | 215/261 (82,4)      | 176/256 (68,8)       | $\chi^2(1) = 13,02$               | < 0,001    |
| 2-й контрольный визит (8-ой день)                                                                            | 251/259 (96,9)      | 235/252 (93,3)       | $\chi^2(1) = 3,67$                | 0,055      |
| Гиперемия слизистой полости рта <sup>д</sup> , n (%)                                                         |                     |                      |                                   |            |
| 1-й контрольный визит (4-ый день)                                                                            | 188/261 (72,0)      | 208/256 (81,3)       | $\chi^2(1) = 6,13$                | 0,013      |
| 2-й контрольный визит (8-ой день)                                                                            | 55/259 (21,2)       | 96/252 (38,1)        | $\chi^2(1) = 17,44$               | < 0,001    |
| Нарушение носового дыхания <sup>д</sup> , n (%)                                                              |                     |                      |                                   |            |
| 1-й контрольный визит (4-ый день)                                                                            | 169/261 (64,8)      | 208/256 (81,3)       | $\chi^2(1) = 17,82$               | < 0,001    |
| 2-й контрольный визит (8-ой день)                                                                            | 68/259 (26,3)       | 111/252 (44,0)       | $\chi^2(1) = 17,77$               | < 0,001    |

<sup>a</sup>Статистика критерия хи-квадрат представлена со степенями свободы, указанными в скобках  $\chi^2(df)$ ; U-критерий Манна-Уитни представлен с использованием нормализованной статистики критерия.

<sup>б</sup>Приведены эмпирические оценки, которые получены путем сглаживания кривых, показанных на рисунке 3.

<sup>в</sup>База: пациенты с нарушениями, зафиксированными при исходной оценке.

<sup>г</sup>База: пациенты с записями в дневнике.

<sup>д</sup>Оценка проводилась в кабинете врача-исследователя во время контрольных визитов; база: пациенты, которые нанесли соответствующий визит.

нуждались в дополнительных вариантах лечения. Выявление и отделение ИВДП, вызванных вирусом гриппа, позволили более полно определить исследуемую выборку.

Еще одна сильная сторона данного исследования состоит в том, что в него было включено большое число пациентов, что увеличивает точность проведенных оценок. Настоящее исследование характеризуется высокой внешней валидностью, поскольку его дизайн основан на обычной ситуации в клинической практике, когда следует принять решение: предлагать Инфлюцид дополнительно к симптоматической терапии или нет.

Слабой стороной исследования являлось то, что назначенное лечение не ослеплялось, что могло привести к систематической ошибке. Хотя основная оценка эффективности исходила частично от объективных показателей, таких как отсутствие лихорадки, нельзя с уверенностью исключить, что оценка некоторых иных показателей эффективности (особенно субъективных) в группе IFC была завышена в сравнении с группой ST. Аналогичным образом, отсутствие ослепления могло влиять и на решение врача назначать симптома-

тическое лечение. Мы старались уменьшить это влияние путем предоставления симптоматического лечения всем пациентам как часть исследуемых лекарственных препаратов, поэтому никаких различий между группами не было. В принципе, ослепление можно было бы обеспечить за счет назначения пациентам из контрольной группы плацебо, не отличающегося по внешнему виду от препарата Инфлюцид. Однако мы решили этого не делать, поскольку стремились как можно ближе придерживаться обычной клинической практики. Включение плацебо означало бы неуверенность пациента в том, что он применяет Инфлюцид, так как с вероятностью 50% он мог бы применять плацебо. В исследованиях депрессии было показано, что возможность приёма плацебо в клинических исследованиях может влиять на результат [21]. Что касается других заболеваний, в том числе ИВДП, то мы пока не знаем, какое влияние может иметь возможность приёма плацебо в клинических исследованиях. Если бы мы выбрали дизайн с плацебо в качестве контроля, как указано выше, то эффект Инфлюцида мог бы измениться непредсказуемым образом, в результате чего исследование имело бы меньше отношения к обычной

**Таблица 4.** Исчезновение отдельных симптомов, указанных в пунктах опросника WURSS-21 (2–20), и дополнительных жалоб; анализ по намерению проводить лечение (ITT-выборка)

| Показатель эффективности <sup>а</sup>                                                  | Общее число пациентов <sup>б</sup> , n (IFC/ST) | Группа IFC, n = 261 | Группа ST, n = 256 | Критерий, статистика <sup>в</sup> | p-значение |
|----------------------------------------------------------------------------------------|-------------------------------------------------|---------------------|--------------------|-----------------------------------|------------|
| Время до исчезновения отдельных симптомов, указанных в пунктах опросника WURSS-21, дни |                                                 |                     |                    |                                   |            |
| Насморк                                                                                | 334 (165/169)                                   | 6,0 (4,0; 8,0)      | 8,0 (6,0; 10,0)    | Z = –5,36                         | < 0,0001   |
| Заложенность носа                                                                      | 367 (190/177)                                   | 6,0 (4,0; 8,0)      | 8,0 (5,0; 9,0)     | Z = –4,91                         | < 0,0001   |
| Чихание                                                                                | 330 (162/168)                                   | 4,0 (3,0; 6,0)      | 6,0 (4,0; 8,0)     | Z = –4,91                         | < 0,0001   |
| Боль в горле                                                                           | 355 (184/171)                                   | 5,0 (4,0; 7,0)      | 6,0 (5,0; 8,0)     | Z = –4,27                         | < 0,0001   |
| Першение в горле                                                                       | 360 (188/172)                                   | 5,0 (4,0; 7,0)      | 6,0 (4,0; 8,0)     | Z = –3,65                         | 0,0003     |
| Кашель                                                                                 | 339 (166/173)                                   | 7,0 (4,0; 9,0)      | 9,0 (7,0; 11,0)    | Z = –5,54                         | < 0,0001   |
| Охриплость                                                                             | 278 (146/132)                                   | 4,0 (3,0; 7,0)      | 6,0 (3,5; 8,0)     | Z = –3,17                         | 0,0015     |
| Тяжесть в голове                                                                       | 399 (200/199)                                   | 4,0 (3,0; 6,0)      | 6,0 (5,0; 8,0)     | Z = –5,84                         | < 0,0001   |
| Стеснение в грудной клетке                                                             | 192 (95/97)                                     | 5,0 (3,0; 8,0)      | 7,0 (4,0; 10,0)    | Z = –3,23                         | 0,0012     |
| Ощущение усталости                                                                     | 457 (237/220)                                   | 6,0 (4,0; 7,0)      | 8,0 (6,0; 10,0)    | Z = –6,65                         | < 0,0001   |
| Способность ясно мыслить                                                               | 334 (163/171)                                   | 5,0 (4,0; 7,0)      | 7,0 (5,0; 9,0)     | Z = –4,85                         | < 0,0001   |
| Хороший сон                                                                            | 419 (216/203)                                   | 5,0 (3,0; 7,0)      | 7,0 (5,0; 9,0)     | Z = –5,43                         | < 0,0001   |
| Свободное дыхание                                                                      | 400 (200/200)                                   | 6,0 (4,0; 7,0)      | 8,0 (5,0; 9,0)     | Z = –5,45                         | < 0,0001   |
| Ходьба/подъем по лестнице/физические упражнения                                        | 393 (202/191)                                   | 6,0 (4,0; 7,0)      | 8,0 (6,0; 10,0)    | Z = –6,27                         | < 0,0001   |
| Способность выполнять повседневные действия                                            | 399 (207/192)                                   | 6,0 (4,0; 7,0)      | 8,0 (6,0; 9,0)     | Z = –6,82                         | < 0,0001   |
| Работа вне дома                                                                        | 396 (205/191)                                   | 6,0 (4,0; 7,0)      | 8,0 (6,0; 10,0)    | Z = –6,39                         | < 0,0001   |
| Работа дома                                                                            | 402 (207/195)                                   | 5,0 (4,0; 7,0)      | 7,0 (5,0; 9,0)     | Z = –6,64                         | < 0,0001   |
| Коммуникация с другими людьми                                                          | 390 (203/187)                                   | 5,0 (4,0; 7,0)      | 7,0 (5,0; 9,0)     | Z = –6,48                         | < 0,0001   |
| Способность вести личную жизнь                                                         | 392 (205/187)                                   | 5,0 (4,0; 7,0)      | 7,0 (5,0; 9,0)     | Z = –6,37                         | < 0,0001   |
| Время до исчезновения дополнительных жалоб, дни                                        |                                                 |                     |                    |                                   |            |
| Головная боль                                                                          | 413 (207/206)                                   | 4,0 (3,0; 7,0)      | 6,0 (4,0; 8,0)     | Z = –5,17                         | < 0,0001   |
| Боль в конечностях                                                                     | 384 (197/187)                                   | 4,0 (3,0; 5,0)      | 5,0 (4,0; 7,0)     | Z = –5,03                         | < 0,0001   |
| Слабость                                                                               | 450 (234/216)                                   | 5,0 (4,0; 7,0)      | 7,0 (5,0; 10,0)    | Z = –5,59                         | < 0,0001   |
| Отсутствие аппетита                                                                    | 396 (201/195)                                   | 5,0 (4,0; 6,0)      | 6,0 (4,0; 9,0)     | Z = –4,81                         | < 0,0001   |
| Раздражительность/плаксивость <sup>г</sup>                                             | 211 (107/104)                                   | 5,0 (4,0; 7,0)      | 6,0 (4,0; 10,0)    | Z = –3,56                         | 0,0004     |
| Сниженная активность <sup>г</sup>                                                      | 228 (113/115)                                   | 5,0 (4,0; 7,0)      | 7,0 (5,0; 10,0)    | Z = –3,95                         | < 0,0001   |

<sup>а</sup>За исключением специально оговоренных случаев, указаны медиана и (P25, P75).  
<sup>б</sup>База: пациенты, у которых соответствующий симптом проявлялся при исходной оценке и исчезал в период наблюдения.  
<sup>в</sup>U-критерий Манна-Уитни представлен с использованием нормализованной статистики критерия.  
<sup>г</sup>Оценивалась только у детей младше 12 лет (в общей сложности в возрасте < 12 лет принял участие 261 пациент, из них соответственно 130 пациентов в группе IFC и 131 пациент в группе ST).

клинической практике. Еще один, более общий, аргумент в пользу выбранного нами дизайна исследования, состоит в том, что, по мнению ведущих специалистов в области комплементарной и альтернативной медицины (КАМ), в случае комбинированных или альтернативных препаратов, имеющих длительную историю применения (в том числе, гомеопатических), требуется другая концепция исследования, при которой основной акцент делается не только на эффективности, но и на пользе [22]. Наше исследование хорошо вписывается в эту концепцию.

#### *Интерпретация результатов в свете предыдущих публикаций и их значение для будущих исследований*

Результаты настоящего исследования, в котором изучался гомеопатический препарат для лечения ИВДП, имеют отноше-

ние как к профилактике ИВДП [23, 24], так и к лечению хронических и рецидивирующих ИВДП [25–27]. Имеются данные и по другим показаниям, включая ИВДП [28–30] и лечение острого кашля, который может возникать при ИВДП [31]. Изучались как различные специфические препараты, так и индивидуальные схемы гомеопатического лечения. Кроме того, мы выявили 3 неконтролируемых исследования: одно исследование, в котором изучалась индивидуальная схема гомеопатического лечения хронических ИВДП [32], одно исследование комбинированного препарата для лечения простуды [33] и одно сравнительное когортное исследование, которое показало, что при сопоставимых клинических результатах пациенты, применяющие гомеопатические препараты, употребляют достоверно меньше антибиотиков, чем пациенты, применяющие обычные средства [34]. Таким образом, конкрет-

ных данных по лечению острых форм ИВДП мало, однако имеющиеся данные обнадеживают.

Шесть гомеопатических компонентов, входящих в состав Инфлюцида, уже давно применяются для лечения гриппоподобных инфекций и ИВДП. Эффективность и безопасность Инфлюцида (немецкое название: Nisülen®) в первоначальной форме выпуска (растворе) были показаны в открытом исследовании с участием 94 пациентов, получавших препарат для лечения ИВДП [16]. В многоцентровом открытом исследовании, включавшем 600 пациентов [17] (333 взрослых, 267 детей) с ИВДП, примерно у 90% пациентов было отмечено улучшение через 3 дня. В другом исследовании сравнивали пользу от применения Инфлюцида у детей в возрасте 3-6 лет с ИВДП в сравнении с когортой детей, получавших симптоматическое лечение [35]. В группе ИФС клинические симптомы ослабевали достоверно раньше. Однако схема лечения в этом исследовании назначалась не с помощью рандомизации. Хотя результаты вышеперечисленных исследований обнадеживают, их недостатком является отсутствие надлежащей контрольной группы, в связи с чем мы и провели настоящее исследование.

В последующих исследованиях потребуются оценить основные показатели эффективности – снижение лихорадки и симптомов – по прошествии 4-7 дней, поскольку в случае заболеваний, которые проходят самостоятельно (как ИВДП), такой промежуток времени является оптимальным для демонстрации более быстрого выздоровления при применении гомеопатических препаратов. Наверняка, необходимы дальнейшие контролируемые исследования по изучению и для подтверждения роли гомеопатических лекарственных средств в лечении ИВДП.

## Литература

- 1 Heikkinen T, Järvinen A: The common cold. *Lancet* 2003;361:51–59.
- 2 Gwaltney JM: Viral respiratory infection therapy: historical perspectives and current trials. *Am J Med* 2002; 112(suppl 6A):33S–41S.
- 3 Mascarenhas AR, Seibold JA, Cundy WJ, McGuire T, van Driel ML: Homeopathic remedies for preventing and treating acute respiratory tract infections in children. *Cochrane Database Syst Rev* 2011;12:CD005974.
- 4 Monto AS, Fendrick AM, Sarnes MW: Respiratory illness caused by picornavirus infection: a review of clinical outcomes. *Clin Ther* 2001;23:1615–1627.
- 5 Gwaltney JM Jr, Hendley JO, Simon G, Jordan WS Jr: Rhinovirus infections in an industrial population. II. Characteristics of illness and antibody response. *JAMA* 1967;202:494–500.
- 6 National Institute of Allergy and Infectious Diseases: Common cold. 2012. [www.niaid.nih.gov/TOPICS/COMMONCOLD/Pages/default.aspx](http://www.niaid.nih.gov/TOPICS/COMMONCOLD/Pages/default.aspx).
- 7 Garibaldi RA: Epidemiology of community-acquired respiratory tract infections in adults. Incidence, etiology, and impact. *Am J Med* 1985;78(suppl 6B):32–37.
- 8 Gwaltney JM: Clinical significance and pathogenesis of viral respiratory infections. *Am J Med* 2002;112(6 suppl 1):13S–18S.
- 9 Monto AS, Sullivan KM: Acute respiratory illness in the community. Frequency of illness and the agents involved. *Epidemiol Infect* 1993;110:145–160.
- 10 World Health Organization: Influenza. Fact sheet no. 211. Revised 2003. [www.who.int/mediacentre/factsheets/2003/fs211/en/](http://www.who.int/mediacentre/factsheets/2003/fs211/en/).
- 11 Fashner J, Ericson K, Werner S: Treatment of the common cold in children and adults. *Am Fam Physician* 2012;86:153–159.
- 12 Hees K, Scott JD: Prevention and treatment of the common cold in adults. *Pharm Times* 2008;74:109–116.
- 13 Simasek M, Blandino DA: Treatment of the common cold. *Am Fam Physician* 2007;75:515–520.
- 14 McCaig LF, Besser RE, Hughes JM: Trends in antimicrobial prescribing rates for children and adolescents. *JAMA* 2002;287:3096–3102.
- 15 Fisher P: What is homeopathy? An introduction. *Front Biosci (Elite Ed)* 2012;4:1669–1682.
- 16 Flakamp G, Galuska S: Fieberhafte Erkältungskrankheiten. Erfolgreiche Behandlung mit einem homöopathischen Kombinationspräparat. *Der Kassenarzt* 1992; 49:42–50.
- 17 Heger M: International outcome study NI001: upper respiratory infections and feverish colds – effectiveness and safety of Nisülen tablets; biometrical report. DHU, Karlsruhe, 1997.
- 18 Kirkby R, Calabrese C, Kaltman L, Monnier J, Herscu P: Methodological considerations for future controlled influenza treatment trials in complementary and alternative medicine. *J Altern Complement Med* 2010;16: 275–283.
- 19 Kirkby R, Herscu P: Homeopathic trial design in influenza treatment. *Homeopathy* 2010;99:69–75.
- 20 Barrett B, Brown RL, Mundt MP, Thomas GR, Barlow SK, Highstrom AD, Bahrainian M: Validation of a short form Wisconsin Upper Respiratory Symptom Survey (WURSS-21). *Health Qual Life Outcomes* 2009;7:76.
- 21 Papakostas GI, Fava M: Does the probability of receiving placebo influence clinical trial outcome? A meta-regression of double-blind, randomized clinical trials in MDD. *Eur Neuropsychopharmacol* 2009;19:34–40.
- 22 Fønnebo V, Grimsgaard S, Walach H, Ritenbaugh C, Norheim AJ, MacPherson H, Lewith G, Launsø L, Koithan M, Falkenberg T, Boon H, Aickin M: Researching complementary and alternative treatments – the gatekeepers are not at home. *BMC Med Res Methodol* 2007;7:7.
- 23 Steinsbekk A, Fønnebo V, Lewith G, Bentzen N: Homeopathic care for the prevention of upper respiratory tract infections in children: a pragmatic, randomised, controlled trial comparing individualised homeopathic care and waiting-list controls. *Complement Ther Med* 2005;13:231–238.
- 24 Supino C: Prevenzione delle infezioni delle alte vie respiratorie in età pediatrica con Omeogriphi®. Studio multicentrico controllato. (Omeogriphi®: prevention of upper respiratory infections in paediatrics. A controlled, multicentric study). *La Medicina Biologica* 2002;19–23.

## Вывод

У участников исследования, применявших гомеопатический лекарственный препарат в дополнение к обычной стандартной симптоматической терапии, отмечалось сокращение длительности ИВДП, снижение потребности в применении средств симптоматического лечения и хорошая переносимость гомеопатического препарата. Несмотря на необходимость проведения дальнейших подтверждающих исследований, настоящее исследование показывает, что назначение препарата Инфлюцид обосновано при лечении пациентов с ИВДП.

## Благодарности

Мы благодарим всех исследователей и пациентов, которые участвовали в этом исследовании, а также Р. ван Хазелена (R. van Haselen) за помощь в подготовке статьи для публикации. Мы также выражаем благодарность И. Айдин-Явузу (Y. Aydin-Yavuz) и С. де Егере (S. De Jaegere) (Карлсруэ); С. Крамареву (S. Kramarev), И. Борзенко (I. Borzenko), Д. Кобыше (D. Kobyshe) и И. Семенчуку (I. Semenchuk) (Киев); С. Веберу (S. Weber) (Магдебург); Н. Гмайневизеру (N. Gmeinwieser), Т. Хуберу (T. Huber) и Р. Пиллеру (R. Piller) (Мюнхен) за помощь в проведении исследования.

## Заявление о раскрытии информации

МТ и VM получили гонорар за консультации в рамках координации исследования. ТК получили гонорар от Немецкого Гомеопатического Союза за вклад в исследование. РК является сотрудником Немецкого Гомеопатического Союза.

- 25 De Lange de Klerk ES, Blommers J, Kruik DJ, Bezemer PD, Feenstra L: Effect of homeopathic medicines on daily burden of symptoms in children with recurrent upper respiratory tract infections. *BMJ* 1994;309:1329–1332.
- 26 Jobst D, Altiner A, Wegscheider K, Abholz HH: Helfen intramuskuläre Eigenblutgaben bei chronisch rezidivierenden Infekten der Atemwege? – Fußangeln auf dem Weg einer randomisierten Studie. *Z Allg Med* 2005;81:258–263.
- 27 Steinsbekk A, Bentzen N, Fønnebø V, Lewith G: Self treatment with one of three self selected, ultramolecular homeopathic medicines for the prevention of upper respiratory tract infections in children. A double-blind randomized placebo controlled trial. *Br J Clin Pharmacol* 2005;59:447–455.
- 28 Bornoroni C: Diatesi linfatico-essudativa in trattamento con timosina a dosi omeopatiche. (Treatment of lymph-exudative diathesis with thymosin in homeopathic doses). *T.M.A. Italian Journal of Holistic Medicine* 1997;11:3–9.
- 29 Stippig SG: Atemwegserkrankungen bei Kindern – Homöopathische und konventionelle Behandlung gleich gut. *Allgemeinarzt* 1996;18:931–936.
- 30 Chakraborty PS, Lamba CD, Nayak D, John MD, Sarkar DB, Poddar A, Arya JS, Raju K, Vivekanand K, Binod Kumar Singh H, Baig H, Prusty AK, Vikram Singh, Nayak C: Effect of individualized homeopathic treatment in influenza like illness: a multicenter, single blind, randomized, placebo controlled study. *Indian Journal of Research in Homoeopathy* 2013;7:22–30.
- 31 Zanasi A, Mazzolini M, Tursi F, Morselli-Labate AM, Paccapelo A, Lecchi M: Homeopathic medicine for acute cough in upper respiratory tract infections and acute bronchitis: a randomized, double-blind, placebo-controlled trial. *Pulm Pharmacol Ther* 2014;27:102–108.
- 32 Ramchandani NM: Homeopathic treatment of upper respiratory tract infections in children: evaluation of thirty case series. *Complement Ther Clin Pract* 2010;16:101–108.
- 33 Schmiedel V, Klein P: A complex homeopathic preparation for the symptomatic treatment of upper respiratory infections associated with the common cold: an observational study. *Explore (NY)* 2006;2:109–114.
- 34 Schmiedel V, Klein P: A complex homeopathic preparation for the symptomatic treatment of upper respiratory infections associated with the common cold: an observational study. *Explore (NY)* 2006;2:109–114.
- 35 Grimaldi-Bensouda L, Bégaud B, Rossignol M, Avouac B, Lert F, Rouillon F, Bénichou J, Massol J, Duru G, Magnier AM, Abenhaim L, Guillemot D: Management of upper respiratory tract infections by different medical practices, including homeopathy, and consumption of antibiotics in primary care: the EPI3 cohort study in France 2007–2008. *PLoS One* 2014;9:e89990.
- 36 Sitnikov IG, Moryakova NV: Клинико-патогенетические механизмы действия препарата Инфлюцид при острых респираторных вирусных инфекциях у детей. (Clinical-pathogenetic mechanisms of the action of the drug Influcid in acute respiratory viral infections in children). *Infectious Diseases* 2010;8:44–47.

## Disclaimer

The article printed herein has been translated into Russian from the original publication DOI: 10.1159/000430762.

S. Karger GmbH, Freiburg, Germany, cannot be held responsible for any errors or inaccuracies that may have occurred during translation.

This article is copyright-protected. Please note that any further distribution requires a written consent from S. Karger GmbH, Freiburg, Germany.
