# Supplementary material
Source: publisher figshare collection journal article supplement (https://karger.figshare.com/articles/dataset/_/5128048)
Supplement: Supplementary file 2 [file 1]

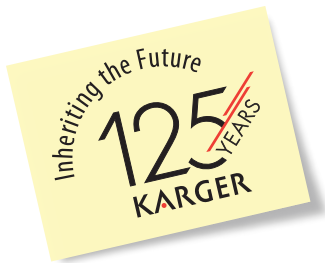

# Forschende Komplementärmedizin

Wissenschaft • Praxis • Perspektiven

## Research in Complementary Medicine

Research • Practice • Perspectives

Deutsche Übersetzung, Band 22, Heft 3, Juni 2015,  
DOI: 10.1159/000430762

**Ein homöopathisches Kombinationsarzneimittel  
zur Behandlung von fieberhaften Infektionen  
der oberen Atemwege: eine internationale,  
randomisierte, kontrollierte klinische Prüfung**

**A Homeopathic Combination Preparation  
in the Treatment of Feverish Upper Respiratory  
Tract Infections: An International Randomized  
Controlled Trial**

Manuela Thinesse-Mallwitz<sup>a</sup> Vitaliy Maydannik<sup>b</sup> Thomas Keller<sup>c</sup>  
Petra Klement<sup>d</sup>

<sup>a</sup>Private Practice, Munich, Germany;

<sup>b</sup>Bogomolets National University, Kiev, Ukraine;

<sup>c</sup>Acomed Statistics, Leipzig, Germany;

<sup>d</sup>Deutsche Homöopathie-Union, Karlsruhe, Germany

# Ein homöopathisches Kombinationsarzneimittel zur Behandlung von fieberhaften Infektionen der oberen Atemwege: eine internationale, randomisierte, kontrollierte klinische Prüfung

Manuela Thinesse-Mallwitz<sup>a</sup> Vitaly Maydannik<sup>b</sup> Thomas Keller<sup>c</sup> Petra Klement<sup>d</sup>

<sup>a</sup>Privatpraxis, München, Deutschland;

<sup>b</sup>Bogomolets National University, Kiev, Ukraine; Acomed Statistics, Leipzig, Deutschland; Deutsche Homöopathie-Union, Karlsruhe, Deutschland

## Schlüsselwörter

Oberer Atemwegsinfekt · Grippaler Infekt · Fieber · Randomisierte kontrollierte klinische Prüfung · Homöopathie

## Zusammenfassung

**Hintergrund:** Obere Atemwegsinfekte (OAWI) sind sehr häufig und verursachen erhebliche Krankheitskosten. Wir untersuchten den klinischen Nutzen einer homöopathischen Zusatztherapie. **Patienten und Methoden:** Randomisierte, kontrollierte, multinationale klinische Prüfung. Patienten (1–65 Jahre) mit fieberigem OAWI erhielten entweder bei Bedarf eine symptomatische Standardbehandlung (Paracetamol, Ambroxol und/oder Oxymetazoline; ST-Gruppe) oder für 7 Tage ein homöopathisches Arzneimittel (Influcid®; Deutscher Handelsname: Nisülen®, IFC-Gruppe) plus die gleiche bedarfsorientierte Standardbehandlung. OAWI-Symptome wurden mittels Wisconsin Upper Respiratory Symptom Survey-21 bestimmt. Primärer Endpunkt war die Ansprechrates an Tag 4, definiert als Fieberfreiheit sowie keine oder nur sehr milde OAWI-Symptome. **Ergebnisse:** 523 Patienten (265 IFC-Gruppe, 258 ST-Gruppe) wurden in 12 ukrainischen und 10 deutschen Zentren randomisiert. Die Ansprechrates an Tag 4 lag bei 15,4% in der IFC-Gruppe und 6,7% in der ST-Gruppe ( $\Delta_{\text{IFC-ST}} = 8,7\%$ , 95%-Konfidenzintervall 2,9–14,5%). Die IFC-Gruppe benötigte weniger symptomatische Medikation, und die Symptome besserten sich 1–2 Tage früher. Für 3 bzw. 8 unerwünschte Ereignisse (UE) in der IFC- bzw. ST-Gruppe wurde ein möglicher Kausalzusammenhang zur Behandlung hergestellt. 2 der 3 UEs der IFC-Gruppe wurden mit der symptomatischen Behandlung und 1 UE (Erbrechen) mit der IFC-Behandlung assoziiert. **Schlussfolgerung:** Die homöopathische Behandlung verkürzte die OAWI-Dauer, verringerte den Bedarf an symptomatischer Medikation und wurde gut vertragen.

## Keywords

Upper respiratory tract infections · Common cold · Fever · Randomized controlled clinical trial · Homeopathy

## Summary

**Background:** Upper respiratory tract infections (URTI) are very common and associated with considerable healthcare costs. We evaluated the clinical benefit of a homeopathic add-on therapy. **Patients and Methods:** In this randomized controlled multinational clinical trial, patients (age range 1–65 years) with feverish URTI received either on-demand symptomatic standard treatment (ST group: paracetamol, ambroxol, and/or oxymetazoline), or homeopathic medication (IFC group: Influcid®) for 7 days plus the same on-demand standard treatment. URTI symptoms were assessed using the Wisconsin Upper Respiratory Symptom Survey-21. Response at day 4, defined as absence of fever and absence or very mild degree of URTI symptoms, was the primary outcome measure. **Results:** 523 patients (265 IFC group, 258 ST group) were randomized in 12 Ukrainian and 10 German centers. The responder rate on day 4 was 15.4% in the IFC group and 6.7% in the ST group ( $\Delta_{\text{IFC-ST}} = 8.7\%$ , 95% confidence interval 2.9–14.5%). The IFC group used less symptomatic medication, and symptoms were alleviated 1–2 days earlier. 3 and 8 adverse events (AEs) in the IFC and ST group, respectively, were assessed as possibly treatment-related; 2 out of the 3 AEs in the IFC group were possibly related to symptomatic therapy, 1 (vomiting) to IFC treatment. **Conclusion:** The homeopathic treatment shortened URTI duration, reduced the use of symptomatic medication, and was well tolerated.

## Hintergrund

Obere Atemwegsinfekte (OAWI) oder grippale Infekte sind die am häufigsten auftretenden Krankheiten weltweit und eine der Hauptursachen für Fehltage am Arbeitsplatz und in der Schule. Sie verursachen erhebliche direkte und indirekte Kosten für das Gesundheitswesen, und diese wirtschaftliche Belastung stellt eine große gesundheitspolitische Herausforderung dar [1]. Grippale Infekte treten in der Regel bei den meisten Erwachsenen und Jugendlichen 2 bis 4-mal pro Jahr auf, während kleine Kinder 6 bis 8-mal oder noch öfter daran erkranken [2-4]. Die häufigsten Symptome zu Beginn sind Halsschmerzen, eine laufende Nase, allgemeines Unwohlsein und leichtes Fieber gefolgt von einer verstopften Nase und Husten. Die Symptome erreichen normalerweise ungefähr nach 3 oder 4 Tagen ihren Höhepunkt und dauern bis zu 2 Wochen an; der Median liegt bei 7 Tagen [5, 6]. Die meisten OAWI werden durch virale Krankheitserreger verursacht, am häufigsten durch Rhinoviren [2, 7-9], aber auch durch Grippeviren [10].

Es gibt keine anerkannte Regeltherapie für OAWI. Daher erfolgt die Behandlung in erster Linie symptomatisch [11]. Als häufigste medikamentöse Behandlungen werden Antipyretika, entzündungshemmende, schleimlösende, abschwellende sowie hustenstillende Medikamente eingesetzt, entweder allein oder in Kombination. Bettruhe, heiße Bäder, Inhalationen, Gurgeln und das Trinken von viel Flüssigkeit können unterstützend wirken [6]. Antibiotika werden häufig verschrieben, sind aber oft nicht sinnvoll, da OAWI meistens durch Viren verursacht werden [11]. Antibiotika sind nur im Fall einer bakteriellen Infektion, d.h. bei Streptokokken, und zur Verhinderung von Superinfektionen angezeigt [12, 13]. Eine übermäßige Anwendung kann zur Entwicklung von zunehmend resistenten Erregern führen, die eine wachsende und ernste gesundheitliche Bedrohung darstellen [14].

Homöopathie wird immer beliebter [15]. Sichere und wirksame Therapien der OAWI wären eine willkommene Ergänzung zur konventionellen Behandlung, vor allem weil zahlreiche konventionelle Medikamente nicht für die Anwendung bei kleinen Kindern zugelassen sind. Homöopathie hat eine über 200-jährige Tradition, und ihr wichtigstes therapeutisches Ziel besteht darin, die Selbstheilungskräfte des Körpers anzuregen. Das untersuchte homöopathische Medikament (Influcid®, IFC) Deutsche Homöopathie-Union, DHU, Karlsruhe, Deutschland) wurde, in seiner ursprünglich flüssigen Form, in Deutschland im Jahr 1928 auf den Markt gebracht und ist weltweit zurzeit in 22 Ländern erhältlich. Es enthält eine Kombination aus 6 homöopathischen Wirkstoffen, die ein breites Spektrum an OAWI-Symptomen abdecken. Bisherige Studien weisen darauf hin, dass das Präparat wirksam und sicher bei der Behandlung typischer Erkältungssymptome bei Erwachsenen sowie Kindern ist [16, 17]. Da die konventionelle Behandlung von OAWI nicht immer anschlägt und manchmal zu Nebenwirkungen und inadäquater Anwendung von Antibiotika führt, ist die Suche nach weiteren sicheren und wirksamen Behandlungsmöglichkeiten gerechtfertigt. Deshalb untersuchten wir die Wirksamkeit und Sicherheit von IFC bei OAWI. IFC wurde dabei zusätzlich

zur symptomatischen Standardbehandlung angeboten. Bislang veröffentlichte Methodologien für Studien, welche die Behandlung von Influenza mit homöopathischen Arzneimitteln untersuchen, wurden berücksichtigt [18, 19].

## Methoden

Wir führten eine randomisierte, offene, multizentrische, multinationale, gegen eine Standardbehandlung kontrollierte klinische Prüfung mit 2 Parallelgruppen durch, die die Anforderungen der ICH-Leitlinie zur Guten Klinischen Praxis (Good Clinical Practice) und die Standards der Deklaration von Helsinki erfüllte. Die Patienten wurden von November 2010 bis April 2011 in 12 Zentren in der Ukraine (4 Hausärzte und 8 Kinderärzte) und 10 Zentren in Deutschland (4 Hausärzte und 6 Kinderärzte) nach Genehmigung durch die zuständigen Ethikkommissionen und zuständigen Behörden rekrutiert. Die Studie wurde vor Aufnahme der Patienten im ISRCTN-Studienregister eingetragen (Nr.: ISRCTN60440500).

Pädiatrische und erwachsene Patienten mit klinischen Anzeichen und Symptomen einer OAWI von bis zu 24 h Dauer, die mit Fieber  $\geq 37,5^\circ\text{C}$  einhergehend (axillare Temperaturmessung) wurden auf ihre Eignung für die Studienteilnahme voruntersucht. Tab. 1 gibt einen Überblick über alle Ein- und Ausschlusskriterien.

Geeignete Patienten, die ihre Einwilligung zur Studienteilnahme gegeben hatten, wurden randomisiert, um entweder nach Bedarf die symptomatische Standardtherapie (Paracetamol, Ambroxol und/oder Oxymetazolin; ST-Gruppe) oder die gleiche symptomatische Standardtherapie und zusätzlich über 7 Tage IFC (IFC-Gruppe) zu erhalten. Die Randomisierung erfolgte zentral anhand einer mit SAS Version 9.1 (SAS Institute Inc., NS, USA) erzeugten Randomisierungsliste in Viererblöcken. Patienten erhielten bei Aufnahme in die klinische Prüfung eine Patientennummer in aufsteigender Reihenfolge, mit der die Zuordnung zur Behandlungsgruppe gemäß Randomisierungsschema festgelegt wurde. Somit wurde eine zufällige Zuordnung zur jeweiligen Behandlungsgruppe sichergestellt.

Um eine altersstratifizierte ( $< 12$  oder  $\geq 12$  Jahre) Rekrutierung der Patienten zu gewährleisten, wurden Faxbenachrichtigungen nach Randomisierung versendet und somit das Alter der aufgenommenen Teilnehmer verfolgt. Die Rekrutierung wurde beendet, sobald die vorgegebene Anzahl an Patienten in der definierten Altersgruppe erreicht war.

Die Patienten führten ein Behandlungstagebuch und maßen mehrmals täglich ihre axillare Temperatur. Sie wurden vom Prüfer beim Termin zu Studienbeginn (Tag 1) sowie an Tag 4, Tag 8 und Tag 15 untersucht und erhielten außerdem einen Kontrollanruf zur Nachbeobachtung an Tag 2 und Tag 3. Patienten der Testgruppe erhielten IFC-Tabletten, die eine Kombination der folgenden homöopathischen Einzelmittel enthalten (die Zahl hinter dem «D» steht für die Anzahl der dezimalen Verdünnungsschritte): Aconitum (Eisenhut) D3, Bryonia (Zaunrübe rot oder weiß) D2, Eupatorium perfoliatum (Wasserdost) D1, Gelsemium (Gelber Jasmin) D3, Ipecacuanha (Brechwurzel) D3 und Phosphorus (Phosphor) D5. Jugendliche ( $\geq 12$  Jahre) und Erwachsene wurden angewiesen, während der ersten 72 h 12 Tabletten täglich (1 Tablette jede Stunde) oral einzunehmen, Kinder ( $< 12$  Jahre) sollten 8 Tabletten täglich (1 Tablette alle 2 h) einnehmen. Während der folgenden 96 h nahmen Jugendliche und Erwachsene 3-mal täglich 2 Tabletten und Kinder 3-mal täglich 1 Tablette. Paracetamol-Saft, Ambroxol-Saft und Oxymetazolin-Nasenspray wurden allen Patienten nach Bedarf als symptomatische Standardmedikation angeboten (jeweils als ein fiebersenkendes oder schleimlösendes Mittel bzw. als Präparat zum Abschwellen der Nasenschleimhäute).

Das Primärziel bestand darin, die Wirksamkeit und Sicherheit von IFC als Zusatz zur symptomatischen Standardbehandlung von OAWI zu bewerten. Als primärer Endpunkt wurde das Ansprechen auf die Behandlung (Response) an Tag 4 festgelegt, das als Kombination aus i) einer durchschnittlichen axillaren Temperatur  $\leq 37,2^\circ\text{C}$  an Tag 4 und ii) keiner oder sehr leichter Symptomatik

**Tab. 1.** Patienten-Auswahlkriterien

| Einschlusskriterien                                                                              | Ausschlusskriterien                                                                                                                                                                                                                                                                                                                                                                                                               |
|--------------------------------------------------------------------------------------------------|-----------------------------------------------------------------------------------------------------------------------------------------------------------------------------------------------------------------------------------------------------------------------------------------------------------------------------------------------------------------------------------------------------------------------------------|
| Alter 1–65 Jahre                                                                                 | Schwerer oder komplizierter Verlauf der OAWI                                                                                                                                                                                                                                                                                                                                                                                      |
| Diagnostizierte OAWI mit Auftreten folgender Symptome während der letzten 24 h                   | Anzeichen eines akuten Infekts der unteren Atemwege                                                                                                                                                                                                                                                                                                                                                                               |
| a) Fieber (axillare Temperatur $\geq 37,5$ °C)                                                   | Aktuelle Symptome bedingt vor allem durch eine andere Hals-Nasen-Ohren- (HNO-) Erkrankung                                                                                                                                                                                                                                                                                                                                         |
| b) Mindestens ein OAWI-Symptom                                                                   | Vorhandene chronisch-entzündliche HNO- und Atemwegserkrankung                                                                                                                                                                                                                                                                                                                                                                     |
| <i>Nasales Symptom (verstopfte Nase, laufende Nase, Niesen)</i>                                  | Obstruktive anatomische Läsionen im Nasen-Rachen-Raum                                                                                                                                                                                                                                                                                                                                                                             |
| <i>Pharyngeales Symptom (Kratzen im Hals, Halsschmerzen, Pharynxhyperämie)</i>                   | Schwere Begleiterkrankung einschließlich Vorgeschichte einer malignen Erkrankung in den letzten 5 Jahren vor der Rekrutierung                                                                                                                                                                                                                                                                                                     |
| <i>Husten (gewöhnlicher Husten ohne Verdacht auf eine akute Erkrankung der unteren Atemwege)</i> | Galaktose-Intoleranz, Lapp-Laktase-Mangel oder Glukose-Galaktose-Malabsorption                                                                                                                                                                                                                                                                                                                                                    |
| c) Mindestens ein Allgemeinsymptom                                                               | Überempfindlichkeit gegenüber einem der Wirkstoffe und/oder Hilfsstoffe von IFC                                                                                                                                                                                                                                                                                                                                                   |
| <i>Müdigkeit</i>                                                                                 | Überempfindlichkeit gegenüber einem der Wirkstoffe und/oder Hilfsstoffe von der definierten symptomatische Behandlung sowie bekannte Gegenanzeigen für die symptomatische Behandlung                                                                                                                                                                                                                                              |
| <i>Schwäche</i>                                                                                  | Positiver Schnelltest auf $\beta$ -hämolisierende Streptokokken der Gruppe A (GABHS)                                                                                                                                                                                                                                                                                                                                              |
| <i>Gliederschmerzen</i>                                                                          | Behandlung mit Antibiotika, Glukokortikosteroiden, Immunmodulatoren oder Antihistaminika in den letzten 4 Wochen vor oder bei Aufnahme in die Studie, sowie aktuelle Indikation für diese Arzneimittel während der Studie                                                                                                                                                                                                         |
| <i>Nur bei Kindern: gereizt/weinerlich oder weniger aktiv</i>                                    | Indikation für die Verabreichung von oder Behandlung mit antiviralen Medikamenten                                                                                                                                                                                                                                                                                                                                                 |
| Schriftliche Einwilligung                                                                        | Behandlung mit Antipyretika, nasalen Dekongestiva, Expektorantien und/oder anderen Medikamenten oder Maßnahmen zur Linderung von OAWI, z. B. Lokalanästhetika, entzündungshemmende Arzneimitteln, Antitussiva, homöopathische Arzneimittel, Nahrungsergänzungsmittel oder Arzneimitteln mit Zink, Echinacea, Knoblauch oder Vitamin C ( $\geq 100$ mg pro Tag) während der letzten 7 Tage vor oder zu Beginn der Studienteilnahme |
| Bereitschaft und Fähigkeit zur Erfüllung aller studienspezifischen Maßnahmen                     | Starkes Rauchen oder bekannte oder vermutete Drogenabhängigkeit                                                                                                                                                                                                                                                                                                                                                                   |
|                                                                                                  | Unzureichende Verhütung, Schwangerschaft, Stillzeit oder Kinderwunsch                                                                                                                                                                                                                                                                                                                                                             |
|                                                                                                  | Teilnahme an einer anderen klinischen Prüfung in den letzten 3 Monaten vor Studienteilnahme                                                                                                                                                                                                                                                                                                                                       |
|                                                                                                  | Unvermögen oder Unfähigkeit die Art, Bedeutung und Folgen der Studie zu verstehen                                                                                                                                                                                                                                                                                                                                                 |

definiert war. OAWI-Symptome wurden mithilfe des Wisconsin Upper Respiratory Symptom Survey-21 (WURSS-21) beurteilt. Hierbei handelt es sich um einen krankheitsspezifischen Fragebogen zur gesundheitsbezogenen Lebensqualität mit 21 Fragen, bei dem sich 1 Frage auf den allgemeinen Schweregrad bezieht, 10 Fragen auf Symptome sowie 9 Fragen auf die funktionale Lebensqualität beziehen. Eine Frage adressiert die Gesamtveränderung. Alle Fragen wurden auf einer Likert-Skala von 0 bis 7 bewertet [20]. Der WURSS-21 wurde ins Deutsche, Russische und Ukrainische übersetzt und durch Rückübersetzung und kognitive Interviews validiert. Um die Response zu bestimmen, musste die erste Frage des WURSS-21 «Wie krank fühlen Sie sich heute?» mit 0 (nicht krank) oder 1 (sehr leicht) am Morgen und Abend von Tag 4 beantwortet werden.

Die sekundären Endpunkte waren der Anteil der Behandlungsresponder entsprechend der Definition für das Primärziel an allen anderen Tagen außer Tag 4; die Dauer bis zur Symptomlinderung (Antwort auf erste WURSS-21-Frage  $\leq 1$ ); der Anteil der Patienten, die zum Zeitpunkt der Nachbeobachtung wieder ihren normalen täglichen Aktivität nachgingen; Schweregrad und Verlauf der Infektion, die mittels AUC des WURSS-21-Gesamtscores (WURSS-21-Fragen 2–20) und dem WURSS-Symptom-Summen-Subscore (WURSS-21-Fragen 2–11) sowie dem WURSS-Lebensqualitäts-Subscore (WURSS-21-Fragen 12–20) bestimmt wurden; individuelles Abklingen der Symptome (WURSS-21-Fragen 2–20, zudem Kopf-, Gliederschmerzen, Schwäche, Appetitlosigkeit und (nur bei Kindern) Reizbarkeit und verminderte Aktivität); Höhe und Dauer der Gabe von Paracetamol, Ambroxol und Oxymetazolin; Anzahl fieberfreier Patienten; weiterhin bestehende Hyperämie der Rachenschleimhaut und Beeinträchtigung der Nasenatmung. Die

Bewertung der Sicherheit basierte auf dem Auftreten von unerwünschten Ereignissen (UEs).

Eine genaue Fallzahlplanung war wegen des explorativen Charakters der Studie nicht vorgesehen. Das Rekrutierungsziel lag bei 520 Patienten. Die Teststärke (Power) dieses Settings wurde prospektiv im Sinne eines Worst-Case-Szenarios berechnet: Bei Annahme einer Drop-out-Rate von 5% würde die Auswertung von 494 Patienten (247 pro Gruppe) in einer Teststärke von  $> 80\%$  resultieren, um eine mindestens 8%ige Überlegenheit des Responderanteils in der IFC-Gruppe bei einer angenommenen Ansprechrate von höchstens 7% in der ST-Gruppe zu belegen.

Die statistische Analyse basierte auf dem Intention-to-treat (ITT)-Prinzip. Die ITT-Population enthielt diejenigen Patienten, die randomisiert worden waren und für die mindestens eine Beurteilung der Wirksamkeit nach der Eingangserhebung vorlag. Zusätzlich wurde eine Per-Protokoll-Analyse durchgeführt. Sicherheitsanalysen schlossen alle randomisierten Patienten ein. Die Last-Observation-Carried-Forward (LOCF)-Methode wurde bei fehlenden Daten einschließlich vorzeitigem Ausscheiden aus der Studie angewendet. Die Anteile an Patienten mit Response wurden mit dem  $\chi^2$ -Test verglichen. Der Mann-Whitney-U (MWU)-Test wurde für explorative Gruppenvergleiche von kontinuierlich und ordinal skalierten Variablen angewendet. Weiterhin wurden behandlungsbedingte Unterschiede als Hodges-Lehmann (HL)-Schätzungen des Location-Shift (Abweichung zwischen den mittleren Messergebnissen) und ihrer 95%-Konfidenzintervalle (KI) dargestellt. Das Typ-1-Fehlerlevel (Alpha) wurde auf 0,05 festgelegt. Es wurde keine Anpassung für das Testen mehrerer sekundärer Endpunkte vorgenommen. Deshalb wurde in Betracht gezogen, dass

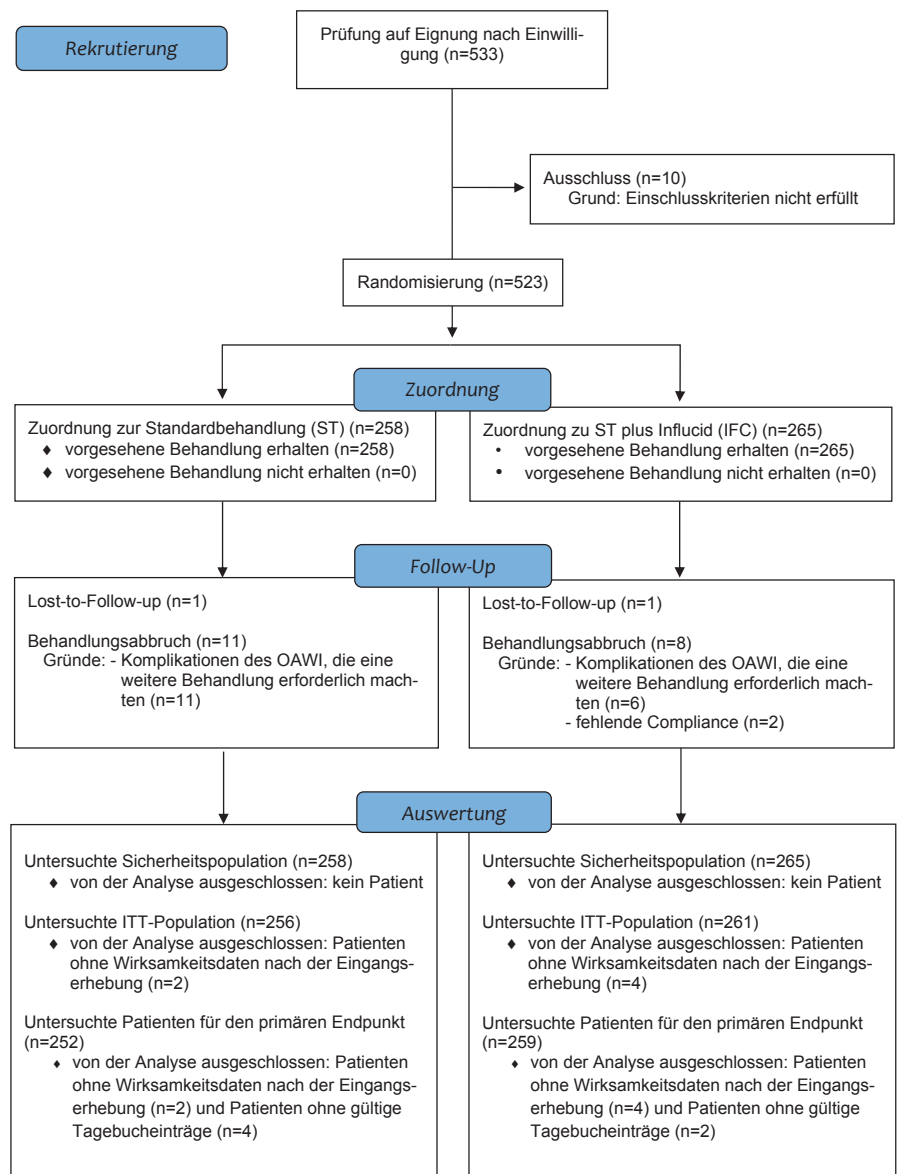

**Abb. 1.** Patienten-Flussdiagramm.

einige signifikante Ergebnisse voraussichtlich zufällig auftreten würden. Die Interpretation der explorativen Analyse beruhte hauptsächlich auf dem Grad der Übereinstimmung mit den Ergebnissen der primären Analysen.

## Ergebnisse

### Teilnehmer

523 Patienten wurden randomisiert (223 in Deutschland, 300 in der Ukraine). Die ITT-Population umfasste 261 Patienten in der IFC-Gruppe (130 Patienten < 12 Jahre, 131 Patienten ≥ 12 Jahre) und 256 in der ST-Gruppe (131 Patienten < 12 Jahre, 125 Patienten ≥ 12 Jahre). Abbildung 1 zeigt ein entsprechendes Flussdiagramm und die Nachverfolgung der Patienten in der Studie.

Demographische Daten und klinische Merkmale der Patienten waren in beiden Behandlungsgruppen zu Studienbeginn vergleichbar (Tab. 2). Influenza-Testergebnisse zeigten, dass nur 14% der OAWI-Fälle mit einer Influenza-Virusinfektion einhergingen.

### Wirksamkeitsauswertung

Das erste Responsekriterium des primären Endpunkts, der Prozentsatz der Patienten, die an Tag 4 fieberfrei waren, war in der IFC-Gruppe im Vergleich zur ST-Gruppe signifikant höher (IFC: 76,8% gegenüber ST: 56,7%;  $p < 0,001$ ). Das zweite Responsekriterium, der Prozentsatz der Patienten, bei denen mittels WURSS-21 keine oder nur sehr leichte Symptome an Tag 4 bestimmt wurden, war ebenfalls in der IFC-Gruppe signifikant höher im Vergleich zu der ST-Gruppe (17,0% IFC gegenüber 7,5% ST,  $p = 0,0012$ ). Der primäre Endpunkt, das Ansprechen auf die Behandlung, das als Erfüllung beider Responsekriterien an Tag 4 definiert war, war in der IFC-Gruppe (15,4%) im Vergleich zur ST-Gruppe signifikant höher (6,7%) ( $\Delta_{\text{IFC-ST}} = 8,7\%$ , 95%-KI: 2,9–14,5%). Die Per-Protokoll-Analyse bestätigte die Ergebnisse der ITT-Analyse (Daten nicht angegeben).

Die Verwendung von Medikamenten zur symptomatischen Behandlung war bei den Patienten beider Behandlungsgruppen, die

**Tab. 2.** Vergleich demographischer, klinischer und anderer relevanter Merkmale, Intention-to-treat (ITT)-Analyse

| Merkmale                                                         | IFC-Gruppe, n = 261 | ST-Gruppe, n = 256 |
|------------------------------------------------------------------|---------------------|--------------------|
| Alter, Median (P25, P75), Jahre                                  |                     |                    |
| Kinder (< 12 Jahre)                                              | 4,0 (3,0; 7,0)      | 5,0 (3,0; 7,0)     |
| Erwachsene/Jugendliche (≥ 12 Jahre)                              | 33,0 (20,0; 45,0)   | 33,0 (22,0; 43,0)  |
| Geschlecht, Männer/Frauen <sup>a</sup> , n (%)                   | 104 (40)/157 (60)   | 118 (46)/138 (54)  |
| Körpergröße, Median (P25, P75), cm                               |                     |                    |
| Kinder (< 12 Jahre)                                              | 110 (98; 126)       | 111 (97; 128)      |
| Erwachsene/Jugendliche (≥ 12 Jahre)                              | 168 (162; 175)      | 170 (164; 178)     |
| Körpergewicht, Median (P25, P75), kg                             |                     |                    |
| Kinder (< 12 Jahre)                                              | 19,3 (15,0; 25,0)   | 19,0 (14,8; 25,0)  |
| Erwachsene/Jugendliche (≥ 12 Jahre)                              | 68,0 (58,0; 80,0)   | 71,1 (60,0; 84,0)  |
| Influenzatest-Ergebnisse (PCR-Analyse), n (%) <sup>a</sup>       |                     |                    |
| Influenza A und B negativ                                        | 227 (87)            | 219 (86)           |
| Influenza A positiv                                              | 19 (7)              | 31 (12)            |
| Influenza B positiv                                              | 12 (5)              | 6 (2)              |
| Körpertemperatur bei Aufnahme in die Studie, Mittelwert (SD), °C | 38,0 (0,4)          | 38,0 (0,4)         |
| OAWI-Leitsymptome bei Aufnahme in die Studie, n (%) <sup>a</sup> |                     |                    |
| Schleimhautreizung                                               | 237 (91)            | 228 (89)           |
| Beeinträchtigung der Nasenatmung                                 | 223 (85)            | 229 (90)           |
| Fähigkeit zur Verrichtung normaler Tätigkeiten                   | 196 (75)            | 209 (82)           |
| Nasale Symptome                                                  | 231 (89)            | 240 (94)           |
| Pharyngeale Symptome                                             | 240 (92)            | 232 (91)           |
| Husten                                                           | 194 (74)            | 208 (81)           |
| Müdigkeit                                                        | 257 (98)            | 249 (97)           |
| Schwäche                                                         | 252 (97)            | 248 (97)           |
| Gliederschmerzen                                                 | 208 (80)            | 208 (81)           |
| Gereizt/weinerlich <sup>b</sup>                                  | 114 (88)            | 114 (87)           |
| Weniger aktiv <sup>b</sup>                                       | 125 (96)            | 126 (96)           |
| WURSS-21-Gesamtscore bei Aufnahme in die Studie, Mittelwert (SD) | 71,4 (24,7)         | 74,4 (25,5)        |

<sup>a</sup>Prozentanteile wurden auf die nächste ganze Zahl gerundet.  
<sup>b</sup>Erhoben nur bei Kindern < 12 Jahre (insgesamt waren 261 Patienten < 12 Jahre alt; davon entfielen 130 auf die IFC- und 131 auf die ST-Gruppe).  
PCR = Polymerase-Kettenreaktion; SD = Standardabweichung.

an Tag 4 auf die Behandlung ansprachen, vergleichbar. In der Subgruppe der Patienten, die an Tag 4 nicht auf die Behandlung ansprachen, war die Anwendung symptomatischer Medikamente in der ST-Gruppe höher.

Die prozentualen Gruppenunterschiede bei den Respondern während der gesamten Studienphase von 14 Tagen sind in Abbildung 2 dargestellt. Die Abbildung zeigt außerdem das frühere Auftreten des Ansprechens auf die Behandlung in der IFC-Gruppe. Der beobachtete Unterschied war an Tag 4 statistisch signifikant ( $\Delta_{\text{IFC-ST}} = 8,7\%$ ), erreichte seine Spitze an Tag 7 ( $\Delta_{\text{IFC-ST}} = 28,9\%$ , 95%-KI: 20,3–37,6%) und dauerte bis Tag 11 an ( $\Delta_{\text{IFC-ST}} = 10,0\%$ , 95%-KI: 2,4–17,7%).

Die Ergebnisse der Auswertung weiterer sekundärer Zielkriterien (Tab. 3) stimmte mit der Aussage der Analyse der primären Zielparmeter überein: Die Zeitspanne bis zur Symptomlinderung, die in der ersten Frage des WURSS beurteilt wurde, war in der IFC-Gruppe 1–2 Tage kürzer (MWU-Test:  $Z = -6,30$ ;  $p < 0,0001$ ; HL:  $\Delta_{\text{IFC-ST}} = -2$  Tage, 95%-KI: -2 bis -1 Tage). Abbildung 3 zeigt die kumulierten Prozentsätze der Patienten mit

Symptomlinderung abhängig vom Studientag. Der Anteil der Patienten, die beim ersten Nachbeobachtungstermin ihrem normalen Tagesablauf nachgehen konnten, war in der IFC-Gruppe 20% höher (IFC: 48% gegenüber ST: 28%). Während des Beobachtungszeitraums zeigten die AUC-Werte des Gesamt-WURSS-21-Scores und der Subscores einen signifikant niedrigeren medianen Schweregrad der Erkrankung in der IFC-Gruppe an. Damit übereinstimmend gingen in der IFC-Gruppe auch einzelne Symptome und Beeinträchtigungen der Lebensqualität, die mit einzelnen WURSS-21-Fragen (2–20) adressiert wurden, sowie zusätzlich erhobene Beschwerden im Vergleich zur ST-Gruppe deutlich früher zurück (Tab. 4). In der IFC-Gruppe verwendeten weniger Patienten Medikamente zur symptomatischen Behandlung, die eingenommene Menge war geringer und die Einnahme wurde früher beendet. Der Anteil der Patienten ohne Fieber war beim ersten Nachbeobachtungstermin in der IFC-Gruppe um 14% höher (IFC: 82,4% gegenüber ST: 68,8%). Beim zweiten Nachbeobachtungstermin fand sich kein signifikanter Gruppenunterschied mehr: > 90% der Patienten waren zu diesem Zeitpunkt fie-

**Abb. 2.** Prozentuale Gruppenunterschiede der Behandlungs-Responder (IFC minus ST) in Abhängigkeit vom Studientag (inklusive 95%-KI).

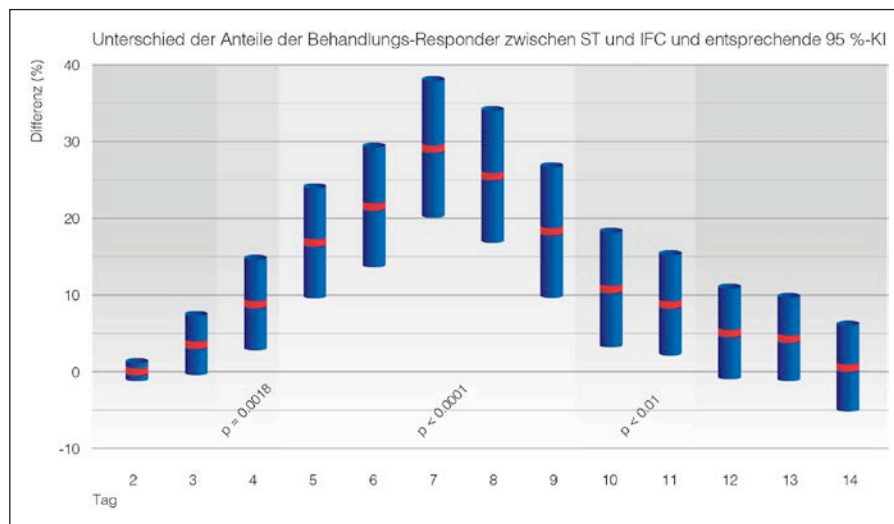

**Abb. 3.** Kumulierte Anzahl an Patienten (in %) mit Symptomminderung (ermittelt anhand der ersten WURSS-Frage) in Abhängigkeit vom Studientag.

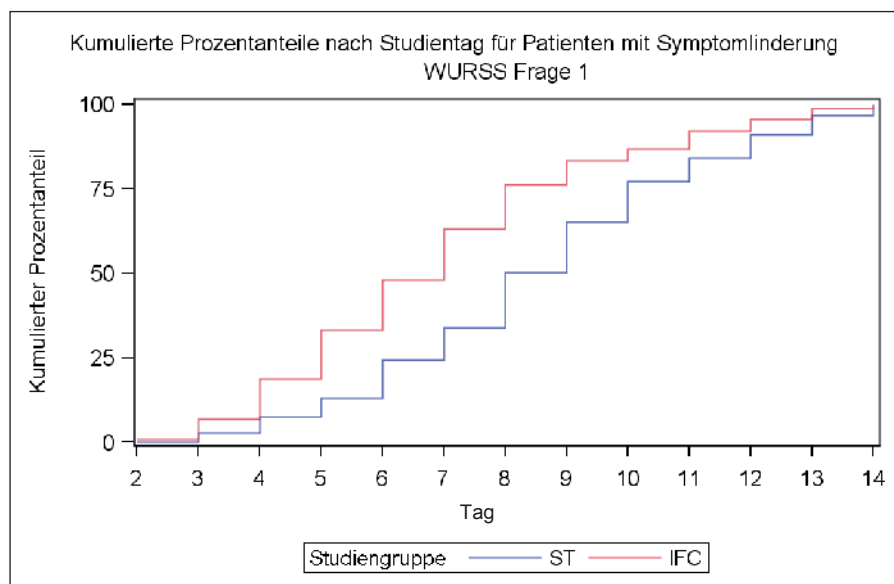

berfrei. Patienten der IFC-Gruppe hatten am ersten und zweiten Nachbeobachtungstermin statistisch signifikant geringere Hyperämien des Rachenraums bzw. Beeinträchtigungen der nasalen Atmung. Mehr als 90% der Patienten hielten sich an die vom Prüfer vorgegebenen Behandlungspläne für den akuten Zustand und die Erhaltungsphase.

#### Sicherheitsbewertung

Bei 64 von 523 Patienten (12,2%) trat mindestens ein UE während der Studie auf; dies war der Fall bei 29 von 265 Patienten (10,9%) in der IFC-Gruppe und bei 35 von 258 (13,6%) in der ST-Gruppe. Insgesamt wurden 85 UE beobachtet. Alle UE wurden als nicht schwerwiegend bewertet. Bei 3 UE in der IFC-Gruppe wurde der Kausalzusammenhang mit der Medikation als «möglich» bewertet; 2 Fälle (Oberbauchschmerzen, Asthenie) standen möglicherweise im Zusammenhang mit der symptoma-

tischen Therapie; ein Fall (Erbrechen) war möglicherweise durch IFC bedingt. Für 8 UE (Übelkeit (n = 2), Durchfall, Mundtrockenheit, gastroösophagealer Reflux, Nasentrockenheit, Hautausschlag, Sehstörungen), die bei 7 Patienten in der ST-Gruppe auftraten, wurde der Zusammenhang mit der Medikation ebenfalls als wahrscheinlich oder möglich eingestuft. 2 UE (beide in der IFC-Gruppe) waren von schwerer Intensität, wurden aber als unabhängig von der Medikamenteneinnahme eingeordnet. Der Schweregrad der verbleibenden 83 UE waren leicht bis mittel. 6 Patienten in der IFC-Gruppe (2,3%) und 11 Patienten der ST-Gruppe (4,3%) wurden aufgrund von UE, die als Komplikationen eingestuft wurden und mit Antibiotika, Glukokortikosteroiden, Immunmodulatoren, Antihistaminika oder antiviralen Medikamenten behandelt werden mussten, aus der Studie ausgeschlossen.

**Tab. 3.** Sekundäre Endpunkte, Intention-to-treat (ITT)-Analyse

| Endpunkt                                                                                        | IFC-Gruppe, n = 261 | ST-Gruppe, n = 256 | Test-Statistik <sup>a</sup> | p-Wert   |
|-------------------------------------------------------------------------------------------------|---------------------|--------------------|-----------------------------|----------|
| Zeit bis zur Symptomlinderung beurteilt mithilfe der 1. WURSS-Frage <sup>b</sup><br>Tage        | 6,6                 | 8,5                | Z = -6,30                   | < 0,0001 |
| Rückkehr zum normalen Tagesablauf <sup>c</sup> beim 1. Nachbeobachtungstermin<br>(Tag 4), n (%) | 94/196 (48,0)       | 58/209 (27,8)      | $\chi^2$ (1) = 17,62        | < 0,001  |
| Schweregrad der Symptome, Median (P25, P75), n (%)                                              |                     |                    |                             |          |
| WURRS-21-Gesamtscore AUC                                                                        | 643,5 (395; 952)    | 928,0 (597; 1312)  | Z = -5,67                   | < 0,001  |
| WURRS-21-Symptomscore (Fragen 2–11) AUC                                                         | 304,0 (197; 453)    | 425,0 (290; 611)   | Z = -5,81                   | < 0,001  |
| WURRS-21-Quality-of-life-Score (Fragen 12–20) AUC                                               | 342,0 (192; 524)    | 484,0 (285; 710)   | Z = -4,99                   | < 0,001  |
| Einnahme symptomatischer Medikation <sup>d</sup> (Paracetamol, Ambroxol,<br>Oxymetazolin)       |                     |                    |                             |          |
| Anzahl Patienten mit Einnahme symptomatischer Medikation, n (%)                                 | 222/259 (85,7)      | 247/252 (98,0)     | $\chi^2$ (1) = 25,62        | < 0,001  |
| Dauer der Einnahme symptomatischer Medikation, Median (P25, P75),<br>Tage                       | 6 (4; 9)            | 9 (7; 12)          | Z = -7,12                   | < 0,001  |
| Paracetamol-Gesamtmenge, Median (P25, P75), mg                                                  | 600,0 (0; 2200)     | 1750,0 (400; 1750) | Z = -6,22                   | < 0,001  |
| Ambroxol-Gesamtmenge, Median (P25, P75), mg                                                     | 112,5 (0; 390)      | 315,0 (113; 630)   | Z = -5,91                   | < 0,001  |
| Oxymetazolin-Gesamtmenge, Median (P25, P75), µg                                                 | 292,5 (0; 675)      | 720,0 (253; 1080)  | Z = -6,39                   | < 0,001  |
| Axillär gemessene Temperatur <sup>e</sup> (kein Fieber), n (%)                                  |                     |                    |                             |          |
| 1. Nachbeobachtungstermin (Tag 4)                                                               | 215/261 (82,4)      | 176/256 (68,8)     | $\chi^2$ (1) = 13,02        | < 0,001  |
| 2. Nachbeobachtungstermin (Tag 8)                                                               | 251/259 (96,9)      | 235/252 (93,3)     | $\chi^2$ (1) = 3,67         | 0,055    |
| Hyperämie der Mundschleimhaut <sup>e</sup> , n (%)                                              |                     |                    |                             |          |
| 1. Nachbeobachtungstermin (Tag 4)                                                               | 188/261 (72,0)      | 208/256 (81,3)     | $\chi^2$ (1) = 6,13         | 0,013    |
| 2. Nachbeobachtungstermin (Tag 8)                                                               | 55/259 (21,2)       | 96/252 (38,1)      | $\chi^2$ (1) = 17,44        | < 0,001  |
| Beeinträchtigung der nasalen Atmung <sup>e</sup> , n (%)                                        |                     |                    |                             |          |
| 1. Nachbeobachtungstermin (Tag 4)                                                               | 169/261 (64,8)      | 208/256 (81,3)     | $\chi^2$ (1) = 17,82        | < 0,001  |
| 2. Nachbeobachtungstermin (Tag 8)                                                               | 68/259 (26,3)       | 111/252 (44,0)     | $\chi^2$ (1) = 17,77        | < 0,001  |

<sup>a</sup>Chi-Quadrat-Test-Statistik mit Angabe der Freiheitsgrade in Klammern ( $\chi^2$  (df)); Mann-Whitney-U-Test mit normalisierter Test-Statistik.

<sup>b</sup>Empirisch geschätzt durch Glättungskurven (Abb. 3).

<sup>c</sup>Basis: Patienten mit Beeinträchtigung bei Aufnahme in die Studie.

<sup>d</sup>Basis: Patienten mit vorhandenen Tagebucheinträgen.

<sup>e</sup>In der Prüfarztpraxis bei den Nachbeobachtungsterminen beurteilt; Basis: Patienten, die die entsprechenden Termine wahrgenommen haben.

## Diskussion

### Hauptergebnisse

Die zusätzliche Gabe von IFC verbesserte das Ansprechen der Patienten auf die Behandlung, verkürzte die Dauer der OAWI, verringerte die Verwendung symptomatischer Medikation und senkte den Schweregrad der Erkrankung. Insgesamt deuten die Studienergebnisse darauf hin, dass IFC die Selbstheilungskräfte der Patienten mobilisiert und die Notwendigkeit für herkömmliche symptomatische Behandlung zum Teil reduziert. Die Ergebnisse bestätigen, dass IFC gut verträglich ist.

### Stärken und Einschränkungen dieser Studie

Die Studie war randomisiert, und die Kontrolle der Einhaltung war Teil des Monitoringprozesses. Eine bezüglich des Alters sehr breit gefächerte Population von pädiatrischen und erwachsenen Patienten wurde in die Studie aufgenommen. Aufgrund des Ausschlusses von bakteriell bedingten OAWI schloss diese Studie diejenigen Patienten ein, bei denen der Bedarf für weitere, nicht-antibiotische Behandlungsmöglichkeiten am größten ist. Die Identifi-

zierung und Abgrenzung von OAWI, die durch das Influenza-Virus verursacht wurden, ermöglichte eine weitere Charakterisierung der Studienpopulation.

Eine weitere Stärke dieser Studie ist die große Anzahl der aufgenommenen Patienten, wodurch die Genauigkeit der Schätzungen erhöht wird. Diese Studie hat eine hohe externe Validität, weil ihr Design repräsentativ für die klinische Routine ist, bei der IFC optional als Zusatzbehandlung angeboten werden kann.

Eine Einschränkung dieser Studie bestand in der fehlenden Verblindung bei der Zuordnung zur Behandlung, was zu einer Verzerrung der Ergebnisse geführt haben könnte. Auch wenn die Beurteilung der Primärergebnisse zum Teil auf objektiven Werten wie Fieberfreiheit beruht, kann nicht mit Sicherheit ausgeschlossen werden, dass insbesondere die subjektiven Endpunkte in der IFC-Gruppe gegenüber der ST-Gruppe überschätzt wurden. Ähnlich kann die Verschreibung symptomatischer Medikation nach Ermessen des Arztes durch die fehlende Verblindung beeinträchtigt werden. Wir haben versucht, diesen Einfluss zu reduzieren, indem die symptomatische Medikation allen Patienten als Teil der Prüfpräparate gegeben wurde, sodass es keine

**Tab. 4.** Abklingen der einzelnen Symptome (ermittelt via WURSS-21-Fragen 2–20) und der zusätzlich erhobenen Beschwerden, Intention-to-treat (ITT)-Analyse

| Endpunkt <sup>a</sup>                                                 | Anzahl der Patienten <sup>b</sup> ,<br>gesamt (IFC/ST) | IFC-Gruppe, n = 261 | ST-Gruppe, n = 256 | Test-Statistik <sup>c</sup> | p-Wert   |
|-----------------------------------------------------------------------|--------------------------------------------------------|---------------------|--------------------|-----------------------------|----------|
| Zeit bis zum Abklingen der einzelnen Symptome (WURSS-21-Fragen), Tage |                                                        |                     |                    |                             |          |
| Laufende Nase                                                         | 334 (165/169)                                          | 6,0 (4,0; 8,0)      | 8,0 (6,0; 10,0)    | Z = –5,36                   | < 0,0001 |
| Verstopfte Nase                                                       | 367 (190/177)                                          | 6,0 (4,0; 8,0)      | 8,0 (5,0; 9,0)     | Z = –4,91                   | < 0,0001 |
| Niesen                                                                | 330 (162/168)                                          | 4,0 (3,0; 6,0)      | 6,0 (4,0; 8,0)     | Z = –4,91                   | < 0,0001 |
| Halsschmerzen                                                         | 355 (184/171)                                          | 5,0 (4,0; 7,0)      | 6,0 (5,0; 8,0)     | Z = –4,27                   | < 0,0001 |
| Kratzen im Hals                                                       | 360 (188/172)                                          | 5,0 (4,0; 7,0)      | 6,0 (4,0; 8,0)     | Z = –3,65                   | 0,0003   |
| Husten                                                                | 339 (166/173)                                          | 7,0 (4,0; 9,0)      | 9,0 (7,0; 11,0)    | Z = –5,54                   | < 0,0001 |
| Heiserkeit                                                            | 278 (146/132)                                          | 4,0 (3,0; 7,0)      | 6,0 (3,5; 8,0)     | Z = –3,17                   | 0,0015   |
| Druck-/Schweregefühl im Kopf                                          | 399 (200/199)                                          | 4,0 (3,0; 6,0)      | 6,0 (5,0; 8,0)     | Z = –5,84                   | < 0,0001 |
| Engegefühl in der Brust                                               | 192 (95/97)                                            | 5,0 (3,0; 8,0)      | 7,0 (4,0; 10,0)    | Z = –3,23                   | 0,0012   |
| Gefühl der Müdigkeit                                                  | 457 (237/220)                                          | 6,0 (4,0; 7,0)      | 8,0 (6,0; 10,0)    | Z = –6,65                   | < 0,0001 |
| Klar denken                                                           | 334 (163/171)                                          | 5,0 (4,0; 7,0)      | 7,0 (5,0; 9,0)     | Z = –4,85                   | < 0,0001 |
| Gut schlafen                                                          | 419 (216/203)                                          | 5,0 (3,0; 7,0)      | 7,0 (5,0; 9,0)     | Z = –5,43                   | < 0,0001 |
| Frei atmen                                                            | 400 (200/200)                                          | 6,0 (4,0; 7,0)      | 8,0 (5,0; 9,0)     | Z = –5,45                   | < 0,0001 |
| Gehen/Treppen steigen/sich bewegen                                    | 393 (202/191)                                          | 6,0 (4,0; 7,0)      | 8,0 (6,0; 10,0)    | Z = –6,27                   | < 0,0001 |
| Alltagstätigkeiten bewältigen                                         | 399 (207/192)                                          | 6,0 (4,0; 7,0)      | 8,0 (6,0; 9,0)     | Z = –6,82                   | < 0,0001 |
| Sich außerhalb des Hauses betätigen                                   | 396 (205/191)                                          | 6,0 (4,0; 7,0)      | 8,0 (6,0; 10,0)    | Z = –6,39                   | < 0,0001 |
| Sich im Haus betätigen                                                | 402 (207/195)                                          | 5,0 (4,0; 7,0)      | 7,0 (5,0; 9,0)     | Z = –6,64                   | < 0,0001 |
| Mit anderen in Kontakt treten                                         | 390 (203/187)                                          | 5,0 (4,0; 7,0)      | 7,0 (5,0; 9,0)     | Z = –6,48                   | < 0,0001 |
| Privatleben führen                                                    | 392 (205/187)                                          | 5,0 (4,0; 7,0)      | 7,0 (5,0; 9,0)     | Z = –6,37                   | < 0,0001 |
| Zeit bis zum Abklingen zusätzlich erhobener Beschwerden, Tage         |                                                        |                     |                    |                             |          |
| Kopfschmerzen                                                         | 413 (207/206)                                          | 4,0 (3,0; 7,0)      | 6,0 (4,0; 8,0)     | Z = –5,17                   | < 0,0001 |
| Gliederschmerzen                                                      | 384 (197/187)                                          | 4,0 (3,0; 5,0)      | 5,0 (4,0; 7,0)     | Z = –5,03                   | < 0,0001 |
| Schwäche                                                              | 450 (234/216)                                          | 5,0 (4,0; 7,0)      | 7,0 (5,0; 10,0)    | Z = –5,59                   | < 0,0001 |
| Appetitlosigkeit                                                      | 396 (201/195)                                          | 5,0 (4,0; 6,0)      | 6,0 (4,0; 9,0)     | Z = –4,81                   | < 0,0001 |
| Gereizt/weinerlich <sup>d</sup>                                       | 211 (107/104)                                          | 5,0 (4,0; 7,0)      | 6,0 (4,0; 10,0)    | Z = –3,56                   | 0,0004   |
| Weniger aktiv <sup>d</sup>                                            | 228 (113/115)                                          | 5,0 (4,0; 7,0)      | 7,0 (5,0; 10,0)    | Z = –3,95                   | < 0,0001 |

<sup>a</sup>Wenn nicht anders angegeben, sind Median und (P25, P75) dargestellt.

<sup>b</sup>Basis: Patienten mit dem betreffenden Symptom bei Aufnahme in die Studie und beobachtetem Symptommrückgang bzw. der Wiederherstellung innerhalb des Beobachtungszeitraums.

<sup>c</sup>Mann-Whitney-U-Test mit normalisierter Test-Statistik.

<sup>d</sup>Nur bei Kindern < 12 Jahren beurteilt (insgesamt 261 Patienten waren < 12 Jahre alt, davon 130 in der IFC- und 131 in der ST-Gruppe).

therapieabhängigen Unterschiede bezüglich der Verfügbarkeit zwischen den Gruppen gab. Es könnte argumentiert werden, dass die Verblindung dadurch hätte erfolgen können, dass der Kontrollgruppe ein nicht unterscheidbares Placebo gegeben worden wäre. Wir haben uns gegen die Implementierung eines Placeboarms entschieden, da wir die praktischen Alltagsbedingungen in der Studie so nah wie möglich abbilden wollten. Der Einschluss eines Placebos wäre mit der Wahrscheinlichkeit einhergegangen, dies in 50% der Fälle auch tatsächlich zu verabreichen. Im Bereich von Depressionen wurde nachgewiesen, dass die Verabreichung von Placebos die Ergebnisse klinischer Studien beeinträchtigen kann [21]. Auch in anderen klinischen Bereichen, einschließlich OAWI, gibt es noch viele offene Fragen, welche Effekte die Möglichkeit auslösen kann, in einer klinischen Prüfung Placebo zu erhalten. Wenn wir ein Placebo-kontrolliertes Studiendesign wie oben angegeben gewählt hätten, hätte die Folge ein Unterschied unbekannter Art in der Wirkung von IFC

sein können, wodurch die Studie weniger repräsentativ in Bezug auf die praxisübliche Behandlung wäre. Ein weiteres, allgemeineres Argument zugunsten unserer Designwahl ist die Forderung führender Forscher der Komplementär- und Alternativmedizin (CAM) nach einem anderen Rahmen für CAM-Behandlungen mit langer Anwendungstradition wie im Falle der Homöopathie, der mehr Wert auf die «Erforschung der Wirkung» als auf die «Erforschung der Wirksamkeit» legt [22]. Unsere Studie passt gut in diesen Rahmen.

#### *Interpretation der Ergebnisse in Hinblick auf frühere Veröffentlichungen und Auswirkungen auf künftige Forschung*

Evidenzbelege aus klinischen Prüfungen zur homöopathischen Behandlung von OAWI liegen für die Prävention von OAWI [23, 24] und die Behandlung von chronisch rezidivierender OAWI [25–27] vor. Darüber hinaus gibt es Belege für andere Erkrankungen, die OAWI einschließen können [28–30], und für die Behand-

lung von akutem Husten [31], der bei OAWI auftreten kann. Dabei wurden sowohl verschiedene spezifische Präparate sowie die individualisierte homöopathische Behandlung untersucht. Zusätzlich haben wir 3 unkontrollierte Studien gefunden: eine zu individualisierter homöopathischer Behandlung von chronischer OAWI [32], eine weitere untersuchte ein Kombinationspräparat bei grippalem Infekt [33] und eine vergleichende Kohortenstudie, die zeigte, dass homöopathisch behandelte Patienten signifikant weniger Antibiotika im Vergleich zu konventionell behandelten Patienten verwenden, bei vergleichbaren klinischen Ergebnissen [34]. Daher ist die spezifische Evidenz zur Behandlung von akuter OAWI begrenzt; die vorliegenden Erkenntnisse sind allerdings vielversprechend.

Die 6 homöopathischen Inhaltsstoffe von IFC haben bei der Behandlung von grippalen Infekten und OAWI eine lange Tradition. Die Wirksamkeit und Sicherheit von IFC in seiner ursprünglichen Form als Lösung (deutscher Name: Nisylan®) wurde in einer offenen Studie mit 94 Patienten bei der Behandlung der OAWI nachgewiesen [16]. In einer multizentrischen, offenen Studie mit insgesamt 600 Patienten (333 Erwachsene, 267 Kinder) mit OAWI wurde bei ungefähr 90% der Patienten eine Verbesserung nach 3 Tagen festgestellt [17]. In einer weiteren Studie wurde die Wirksamkeit von IFC bei Kindern im Alter von 3 bis 6 Jahren, die an OAWI litten, mit der von symptomatischer Medikation verglichen [35]. In der IFC-Gruppe verringerten sich die klinischen Symptome deutlich früher. Allerdings war die Zuordnung zu einer Behandlung in dieser Studie nicht randomisiert. Obwohl die oben genannten Studien vielversprechend sind, stellt das Fehlen einer adäquaten Kontrollgruppe eine Einschränkung dar, weshalb wir die aktuelle Studie durchgeführt haben.

Nachfolgende Studien sollten den Verlauf von Fieber und Symptomen nach 4–7 Tagen untersuchen, da dies ein optimaler

Zeitraum ist, um eine bessere Genesung aufgrund der Einnahme homöopathischer Arzneimitteln bei selbstlimitierenden Erkrankungen wie OAWI aufzuzeigen. Zur Untersuchung und Bestätigung der Rolle von homöopathischen Arzneimitteln bei der Behandlung von OAWI sind weitere kontrollierte klinische Prüfungen notwendig.

## Schlussfolgerung

Die Studiengruppe, die zusätzlich zur symptomatischen Standardtherapie mit dem homöopathischen Arzneimittel IFC behandelt wurde, zeigte eine kürzere OAWI-Symptomatik, benötigte weniger konventionelle symptomatische Medikation und berichtete über eine gute Verträglichkeit. Obwohl weitere bestätigende Studien erforderlich sind, zeigt diese Studie, dass eine Behandlung mit IFC einen positiven Beitrag zur Therapie von OAWI liefern kann.

## Dank

Wir danken allen Prüfern und Patienten, die an dieser Studie teilgenommen haben und R. van Haselen für seine Unterstützung bei der Erstellung des Publikationsmanuskripts. Y. Aydin-Yavuz und S. De Jaegere (Karlsruhe), I. Borzenko, D. Kobyscha und I. Semenchuk (Kiew), S. Weber (Magdeburg), N. Gmeinwieser, T. Huber und R. Piller (München) sei gedankt für die Unterstützung bei der Durchführung der Studie.

## Disclosure Statement

MT und VM erhielten ein Beratungshonorar für die Koordination der Studie. TK erhielt ein Honorar von der Deutschen Homöopathie-Union für seinen Beitrag zur Studie. PK ist Mitarbeiterin der Deutschen Homöopathie-Union.

## Literatur

- Heikkinen T, Järvinen A: The common cold. *Lancet* 2003;361:51–59.
- Gwaltney JM: Viral respiratory infection therapy: historical perspectives and current trials. *Am J Med* 2002; 112(suppl 6A):33S–41S.
- Mascarenhas AR, Seebold JA, Cundy WJ, McGuire T, van Driel ML: Homeopathic remedies for preventing and treating acute respiratory tract infections in children. *Cochrane Database Syst Rev* 2011;12:CD005974.
- Monto AS, Fendrick AM, Sarnes MW: Respiratory illness caused by picornavirus infection: a review of clinical outcomes. *Clin Ther* 2001;23:1615–1627.
- Gwaltney JM Jr, Hendley JO, Simon G, Jordan WS Jr: Rhinovirus infections in an industrial population. II. Characteristics of illness and antibody response. *JAMA* 1967;202:494–500.
- National Institute of Allergy and Infectious Diseases: Common cold. 2012. [www.niaid.nih.gov/TOPICS/COMMONCOLD/Pages/default.aspx](http://www.niaid.nih.gov/TOPICS/COMMONCOLD/Pages/default.aspx).
- Garibaldi RA: Epidemiology of community-acquired respiratory tract infections in adults. Incidence, etiology, and impact. *Am J Med* 1985;78(suppl 6B):32–37.
- Gwaltney JM: Clinical significance and pathogenesis of viral respiratory infections. *Am J Med* 2002;112(6 suppl 1):13S–18S.
- Monto AS, Sullivan KM: Acute respiratory illness in the community. Frequency of illness and the agents involved. *Epidemiol Infect* 1993;110:145–160.
- World Health Organization: Influenza. Fact sheet no. 211. Revised 2003. [www.who.int/mediacentre/factsheets/fs211/en/](http://www.who.int/mediacentre/factsheets/fs211/en/).
- Fashner J, Ericson K, Werner S: Treatment of the common cold in children and adults. *Am Fam Physician* 2012;86:153–159.
- Hees K, Scott JD: Prevention and treatment of the common cold in adults. *Pharm Times* 2008;74:109–116.
- Simasek M, Blandino DA: Treatment of the common cold. *Am Fam Physician* 2007;75:515–520.
- McCaig LF, Besser RE, Hughes JM: Trends in antimicrobial prescribing rates for children and adolescents. *JAMA* 2002;287:3096–3102.
- Fisher P: What is homeopathy? An introduction. *Front Biosci (Elite Ed)* 2012;4:1669–1682.
- Flaskamp G, Galuska S: Fieberhafte Erkältungskrankheiten. Erfolgreiche Behandlung mit einem homöopathischen Kombinationspräparat. *Der Kassenarzt* 1992;49:42–50.
- Heger M: International outcome study NI001: upper respiratory infections and feverish colds – effectiveness and safety of Nisylan tablets; biometrical report. DHU, Karlsruhe, 1997.
- Kirkby R, Calabrese C, Kaltman L, Monnier J, Herscu P: Methodological considerations for future controlled influenza treatment trials in complementary and alternative medicine. *J Altern Complement Med* 2010;16: 275–283.
- Kirkby R, Herscu P: Homeopathic trial design in influenza treatment. *Homeopathy* 2010;99:69–75.
- Barrett B, Brown RL, Mundt MP, Thomas GR, Barlow SK, Highstrom AD, Bahrainian M: Validation of a short form Wisconsin Upper Respiratory Symptom Survey (WURSS-21). *Health Qual Life Outcomes* 2009;12:7:76.

- 21 Papakostas GI, Fava M: Does the probability of receiving placebo influence clinical trial outcome? A meta-regression of double-blind, randomized clinical trials in MDD. *Eur Neuropsychopharmacol* 2009;19:34–40.
- 22 Fønnebo V, Grimsgaard S, Walach H, Ritenbaugh C, Norheim AJ, MacPherson H, Lewith G, Launsø L, Koithan M, Falkenberg T, Boon H, Aickin M: Researching complementary and alternative treatments – the gatekeepers are not at home. *BMC Med Res Methodol* 2007;7:7.
- 23 Steinsbekk A, Fønnebo V, Lewith G, Bentzen N: Homeopathic care for the prevention of upper respiratory tract infections in children: a pragmatic, randomised, controlled trial comparing individualised homeopathic care and waiting-list controls. *Complement Ther Med* 2005;13:231–238.
- 24 Supino C: Prevenzione delle infezioni delle alte vie respiratorie in età pediatrica con Omeogriphi®. Studio multicentrico controllato. (Omeogriphi®: prevention of upper respiratory infections in paediatrics. A controlled, multicentric study). *La Medicina Biologica* 2002;19–23.
- 25 De Lange de Klerk ES, Blommers J, Kruik DJ, Bezemer PD, Feenstra L: Effect of homeopathic medicines on daily burden of symptoms in children with recurrent upper respiratory tract infections. *BMJ* 1994;309:1329–1332.
- 26 Jobst D, Altiner A, Wegscheider K, Abholz HH: Helfen intramuskuläre Eigenblutgaben bei chronisch rezidivierenden Infekten der Atemwege? – Fußangeln auf dem Weg einer randomisierten Studie. *Z Allg Med* 2005;81:258–263.
- 27 Steinsbekk A, Bentzen N, Fønnebo V, Lewith G: Self treatment with one of three self selected, ultramolecular homeopathic medicines for the prevention of upper respiratory tract infections in children. A double-blind randomized placebo controlled trial. *Br J Clin Pharmacol* 2005;59:447–455.
- 28 Bornoroni C: Diatesi linfatico-essudativa in trattamento con timosina a dosi omeopatiche. (Treatment of lymph-exudative diathesis with thymosin in homeopathic doses). *T.M.A. Italian Journal of Holistic Medicine* 1997;11:3–9.
- 29 Stippig SG: Atemwegserkrankungen bei Kindern – Homöopathische und konventionelle Behandlung gleich gut. *Allgemeinarzt* 1996;18:931–936.
- 30 Chakraborty PS, Lamba CD, Nayak D, John MD, Sarkar DB, Poddar A, Arya JS, Raju K, Vivekanand K, Binod Kumar Singh H, Baig H, Prusty AK, Vikram Singh, Nayak C: Effect of individualized homeopathic treatment in influenza like illness: a multicenter, single blind, randomized, placebo controlled study. *Indian Journal of Research in Homeopathy* 2013;7:22–30.
- 31 Zanasi A, Mazzolini M, Tursi F, Morselli-Labate AM, Paccapelo A, Lecchi M: Homeopathic medicine for acute cough in upper respiratory tract infections and acute bronchitis: a randomized, double-blind, placebo-controlled trial. *Pulm Pharmacol Ther* 2014;27:102–108.
- 32 Ramchandani NM: Homeopathic treatment of upper respiratory tract infections in children: evaluation of thirty case series. *Complement Ther Clin Pract* 2010;16:101–108.
- 33 Schmiedel V, Klein P: A complex homeopathic preparation for the symptomatic treatment of upper respiratory infections associated with the common cold: an observational study. *Explore (NY)* 2006;2:109–114.
- 34 Schmiedel V, Klein P: A complex homeopathic preparation for the symptomatic treatment of upper respiratory infections associated with the common cold: an observational study. *Explore (NY)* 2006;2:109–114.
- 35 Grimaldi-Bensouda L, Bégaud B, Rossignol M, Avouac B, Lert F, Rouillon F, Bénichou J, Massol J, Duru G, Magnier AM, Abenheim L, Guillemot D: Management of upper respiratory tract infections by different medical practices, including homeopathy, and consumption of antibiotics in primary care: the EPI3 cohort study in France 2007–2008. *PLoS One* 2014;9:e89990.
- 36 Sitnikov IG, Moryakova NV: Клинико-патогенетические механизмы действия препарата Инфлюцид при острых респираторных вирусных инфекциях у детей. (Clinical-pathogenetic mechanisms of the action of the drug Influcid in acute respiratory viral infections in children). *Infectious Diseases* 2010;8:44–47.

## Disclaimer

Der hier abgedruckte Artikel wurde durch den korrespondierenden Autor vom Original DOI: 10.1159/000430762 ins Deutsche übertragen.

S. Karger GmbH, Freiburg, kann für keinerlei Irrtümer oder Ungenauigkeiten verantwortlich gemacht werden, die im Zusammenhang mit der Übersetzung stehen.

Dieser Artikel ist Copyright-geschützt. Bitte beachten Sie, dass jegliche Weiterverbreitung der schriftlichen Zustimmung durch S. Karger GmbH, Freiburg, bedarf.
